# Supplementary material for: Evidence that synthetic lethality underlies the mutual exclusivity of oncogenic KRAS and EGFR mutations in lung adenocarcinoma
Source: eLife. 2015 Jun 5;4:e06907. doi: 10.7554/eLife.06907 (PMC4478584; doi:10.7554/eLife.06907)
Supplement: Supplementary file 1. — KRAS and EGFR Mutations in Lung Adenocarcinoma (Excel File A). DOI: http://dx.doi.org/10.7554/eLife.06907.009 [file elife06907s001.xlsx]

## Sheet: Sheet1
Supplementary File 1: KRAS and EGFR Mutations in Lung Adenocarcinoma
Dataset	Sample ID	Smoking Status	EGFR Status	KRAS Status	EGFR Mutation	EGFR MutationAssessor Predicted Functional Impact	EGFR Reported In COSMIC	EGFR Predicted Oncogenic	KRAS Mutation	KRAS MutationAssessor Predicted Functional Impact	KRAS Reported In COSMIC	KRAS Predicted Oncogenic
TCGA Provisional	TCGA-73-4670	Smoker	WILD TYPE	MUTANT	WT	N/A	N/A	N/A	A146P	high	Yes	Yes
TSP, Nature 2008	17260	Never Smoker	WILD TYPE	MUTANT	WT	N/A	N/A	N/A	G12A	medium	Yes	Yes
TCGA Provisional	TCGA-17-Z037	Not Available	WILD TYPE	MUTANT	WT	N/A	N/A	N/A	G12A	medium	Yes	Yes
TCGA Provisional	TCGA-67-4679	Smoker	WILD TYPE	MUTANT	WT	N/A	N/A	N/A	G12A	medium	Yes	Yes
TCGA Provisional	TCGA-73-4677	Smoker	WILD TYPE	MUTANT	WT	N/A	N/A	N/A	G12A	medium	Yes	Yes
TCGA Provisional	TCGA-50-5941	Smoker	WILD TYPE	MUTANT	WT	N/A	N/A	N/A	G12A	medium	Yes	Yes
TCGA Provisional	TCGA-91-6836	Smoker	WILD TYPE	MUTANT	WT	N/A	N/A	N/A	G12A	medium	Yes	Yes
Broad, Cell 2012	LUAD-NYU315	Smoker	WILD TYPE	MUTANT	WT	N/A	N/A	N/A	G12A	medium	Yes	Yes
Broad, Cell 2012	LUAD-RT-S01777	Smoker	WILD TYPE	MUTANT	WT	N/A	N/A	N/A	G12A	medium	Yes	Yes
Broad, Cell 2012	LUAD-RT-S01866	Smoker	WILD TYPE	MUTANT	WT	N/A	N/A	N/A	G12A	medium	Yes	Yes
TSP, Nature 2008	16600	Smoker	WILD TYPE	MUTANT	WT	N/A	N/A	N/A	G12A	medium	Yes	Yes
TSP, Nature 2008	16626	Smoker	WILD TYPE	MUTANT	WT	N/A	N/A	N/A	G12A	medium	Yes	Yes
TSP, Nature 2008	17152	Smoker	WILD TYPE	MUTANT	WT	N/A	N/A	N/A	G12A	medium	Yes	Yes
TSP, Nature 2008	17202	Smoker	WILD TYPE	MUTANT	WT	N/A	N/A	N/A	G12A	medium	Yes	Yes
TSP, Nature 2008	17280	Smoker	WILD TYPE	MUTANT	WT	N/A	N/A	N/A	G12A	medium	Yes	Yes
TCGA Provisional	TCGA-35-3615	Never Smoker	WILD TYPE	MUTANT	WT	N/A	N/A	N/A	G12C	medium	Yes	Yes
Broad, Cell 2012	LUAD-S00499	Never Smoker	WILD TYPE	MUTANT	WT	N/A	N/A	N/A	G12C	medium	Yes	Yes
Seo et al.. Genome Research 2012	LC_S16	Never Smoker	WILD TYPE	MUTANT	WT	N/A	N/A	N/A	G12C	medium	Yes	Yes
Seo et al.. Genome Research 2012	LC_S46	Never Smoker	WILD TYPE	MUTANT	WT	N/A	N/A	N/A	G12C	medium	Yes	Yes
TCGA Provisional	TCGA-17-Z008	Not Available	WILD TYPE	MUTANT	WT	N/A	N/A	N/A	G12C	medium	Yes	Yes
TCGA Provisional	TCGA-17-Z016	Not Available	WILD TYPE	MUTANT	WT	N/A	N/A	N/A	G12C	medium	Yes	Yes
TCGA Provisional	TCGA-17-Z022	Not Available	WILD TYPE	MUTANT	WT	N/A	N/A	N/A	G12C	medium	Yes	Yes
TCGA Provisional	TCGA-17-Z036	Not Available	WILD TYPE	MUTANT	WT	N/A	N/A	N/A	G12C	medium	Yes	Yes
TCGA Provisional	TCGA-17-Z042	Not Available	WILD TYPE	MUTANT	WT	N/A	N/A	N/A	G12C	medium	Yes	Yes
TCGA Provisional	TCGA-50-5932	Not Available	WILD TYPE	MUTANT	WT	N/A	N/A	N/A	G12C	medium	Yes	Yes
TCGA Provisional	TCGA-50-5933	Not Available	WILD TYPE	MUTANT	WT	N/A	N/A	N/A	G12C	medium	Yes	Yes
TCGA Provisional	TCGA-50-5936	Not Available	WILD TYPE	MUTANT	WT	N/A	N/A	N/A	G12C	medium	Yes	Yes
Broad, Cell 2012	LUAD-CHTN-MAD06-00678	Not Available	WILD TYPE	MUTANT	WT	N/A	N/A	N/A	G12C	medium	Yes	Yes
TSP, Nature 2008	16929	Not Available	WILD TYPE	MUTANT	WT	N/A	N/A	N/A	G12C	medium	Yes	Yes
TSP, Nature 2008	17238	Not Available	WILD TYPE	MUTANT	WT	N/A	N/A	N/A	G12C	medium	Yes	Yes
TSP, Nature 2008	17766	Not Available	WILD TYPE	MUTANT	WT	N/A	N/A	N/A	G12C	medium	Yes	Yes
TSP, Nature 2008	17777	Not Available	WILD TYPE	MUTANT	WT	N/A	N/A	N/A	G12C	medium	Yes	Yes
TSP, Nature 2008	17781	Not Available	WILD TYPE	MUTANT	WT	N/A	N/A	N/A	G12C	medium	Yes	Yes
Seo et al.. Genome Research 2012	LC_C5	Not Available	WILD TYPE	MUTANT	WT	N/A	N/A	N/A	G12C	medium	Yes	Yes
TCGA Provisional	TCGA-05-4244	Smoker	WILD TYPE	MUTANT	WT	N/A	N/A	N/A	G12C	medium	Yes	Yes
TCGA Provisional	TCGA-05-4250	Smoker	WILD TYPE	MUTANT	WT	N/A	N/A	N/A	G12C	medium	Yes	Yes
TCGA Provisional	TCGA-05-4405	Smoker	WILD TYPE	MUTANT	WT	N/A	N/A	N/A	G12C	medium	Yes	Yes
TCGA Provisional	TCGA-05-4415	Smoker	WILD TYPE	MUTANT	WT	N/A	N/A	N/A	G12C	medium	Yes	Yes
TCGA Provisional	TCGA-05-4417	Smoker	WILD TYPE	MUTANT	WT	N/A	N/A	N/A	G12C	medium	Yes	Yes
TCGA Provisional	TCGA-05-4430	Smoker	WILD TYPE	MUTANT	WT	N/A	N/A	N/A	G12C	medium	Yes	Yes
TCGA Provisional	TCGA-44-2668	Smoker	WILD TYPE	MUTANT	WT	N/A	N/A	N/A	G12C	medium	Yes	Yes
TCGA Provisional	TCGA-44-6777	Smoker	WILD TYPE	MUTANT	WT	N/A	N/A	N/A	G12C	medium	Yes	Yes
TCGA Provisional	TCGA-49-4505	Smoker	WILD TYPE	MUTANT	WT	N/A	N/A	N/A	G12C	medium	Yes	Yes
TCGA Provisional	TCGA-49-6744	Smoker	WILD TYPE	MUTANT	WT	N/A	N/A	N/A	G12C	medium	Yes	Yes
TCGA Provisional	TCGA-50-5051	Smoker	WILD TYPE	MUTANT	WT	N/A	N/A	N/A	G12C	medium	Yes	Yes
TCGA Provisional	TCGA-55-1595	Smoker	WILD TYPE	MUTANT	WT	N/A	N/A	N/A	G12C	medium	Yes	Yes
TCGA Provisional	TCGA-64-5774	Smoker	WILD TYPE	MUTANT	WT	N/A	N/A	N/A	G12C	medium	Yes	Yes
TCGA Provisional	TCGA-64-5778	Smoker	WILD TYPE	MUTANT	WT	N/A	N/A	N/A	G12C	medium	Yes	Yes
TCGA Provisional	TCGA-75-5126	Smoker	WILD TYPE	MUTANT	WT	N/A	N/A	N/A	G12C	medium	Yes	Yes
TCGA Provisional	TCGA-05-4249	Smoker	WILD TYPE	MUTANT	WT	N/A	N/A	N/A	G12C	medium	Yes	Yes
TCGA Provisional	TCGA-05-4403	Smoker	WILD TYPE	MUTANT	WT	N/A	N/A	N/A	G12C	medium	Yes	Yes
TCGA Provisional	TCGA-73-4662	Smoker	WILD TYPE	MUTANT	WT	N/A	N/A	N/A	G12C	medium	Yes	Yes
TCGA Provisional	TCGA-05-4418	Smoker	WILD TYPE	MUTANT	WT	N/A	N/A	N/A	G12C	medium	Yes	Yes
TCGA Provisional	TCGA-44-6144	Smoker	WILD TYPE	MUTANT	WT	N/A	N/A	N/A	G12C	medium	Yes	Yes
TCGA Provisional	TCGA-64-1677	Smoker	WILD TYPE	MUTANT	WT	N/A	N/A	N/A	G12C	medium	Yes	Yes
Broad, Cell 2012	LUAD_E00703	Smoker	WILD TYPE	MUTANT	WT	N/A	N/A	N/A	G12C	medium	Yes	Yes
Broad, Cell 2012	LUAD-B00523	Smoker	WILD TYPE	MUTANT	WT	N/A	N/A	N/A	G12C	medium	Yes	Yes
Broad, Cell 2012	LUAD-B00859	Smoker	WILD TYPE	MUTANT	WT	N/A	N/A	N/A	G12C	medium	Yes	Yes
Broad, Cell 2012	LUAD-B01145	Smoker	WILD TYPE	MUTANT	WT	N/A	N/A	N/A	G12C	medium	Yes	Yes
Broad, Cell 2012	LUAD-B02515	Smoker	WILD TYPE	MUTANT	WT	N/A	N/A	N/A	G12C	medium	Yes	Yes
Broad, Cell 2012	LUAD-E00443	Smoker	WILD TYPE	MUTANT	WT	N/A	N/A	N/A	G12C	medium	Yes	Yes
Broad, Cell 2012	LUAD-F00018	Smoker	WILD TYPE	MUTANT	WT	N/A	N/A	N/A	G12C	medium	Yes	Yes
Broad, Cell 2012	LUAD-F00121	Smoker	WILD TYPE	MUTANT	WT	N/A	N/A	N/A	G12C	medium	Yes	Yes
Broad, Cell 2012	LUAD-F00257	Smoker	WILD TYPE	MUTANT	WT	N/A	N/A	N/A	G12C	medium	Yes	Yes
Broad, Cell 2012	LUAD-FH5PJ	Smoker	WILD TYPE	MUTANT	WT	N/A	N/A	N/A	G12C	medium	Yes	Yes
Broad, Cell 2012	LUAD-LIP77	Smoker	WILD TYPE	MUTANT	WT	N/A	N/A	N/A	G12C	medium	Yes	Yes
Broad, Cell 2012	LUAD-NYU160	Smoker	WILD TYPE	MUTANT	WT	N/A	N/A	N/A	G12C	medium	Yes	Yes
Broad, Cell 2012	LUAD-NYU201	Smoker	WILD TYPE	MUTANT	WT	N/A	N/A	N/A	G12C	medium	Yes	Yes
Broad, Cell 2012	LUAD-NYU584S	Smoker	WILD TYPE	MUTANT	WT	N/A	N/A	N/A	G12C	medium	Yes	Yes
Broad, Cell 2012	LUAD-RT-S01703	Smoker	WILD TYPE	MUTANT	WT	N/A	N/A	N/A	G12C	medium	Yes	Yes
Broad, Cell 2012	LUAD-RT-S01721	Smoker	WILD TYPE	MUTANT	WT	N/A	N/A	N/A	G12C	medium	Yes	Yes
Broad, Cell 2012	LUAD-RT-S01852	Smoker	WILD TYPE	MUTANT	WT	N/A	N/A	N/A	G12C	medium	Yes	Yes
Broad, Cell 2012	LUAD-S00488	Smoker	WILD TYPE	MUTANT	WT	N/A	N/A	N/A	G12C	medium	Yes	Yes
Broad, Cell 2012	LUAD-S01331	Smoker	WILD TYPE	MUTANT	WT	N/A	N/A	N/A	G12C	medium	Yes	Yes
Broad, Cell 2012	LUAD-S01404	Smoker	WILD TYPE	MUTANT	WT	N/A	N/A	N/A	G12C	medium	Yes	Yes
Broad, Cell 2012	LUAD-S01409	Smoker	WILD TYPE	MUTANT	WT	N/A	N/A	N/A	G12C	medium	Yes	Yes
Broad, Cell 2012	LUAD-S01413	Smoker	WILD TYPE	MUTANT	WT	N/A	N/A	N/A	G12C	medium	Yes	Yes
Broad, Cell 2012	LUAD-S01467	Smoker	WILD TYPE	MUTANT	WT	N/A	N/A	N/A	G12C	medium	Yes	Yes
Broad, Cell 2012	LUAD-U6SJ7	Smoker	WILD TYPE	MUTANT	WT	N/A	N/A	N/A	G12C	medium	Yes	Yes
Broad, Cell 2012	LUAD-LC15C	Smoker	WILD TYPE	MUTANT	WT	N/A	N/A	N/A	G12C	medium	Yes	Yes
TSP, Nature 2008	16596	Smoker	WILD TYPE	MUTANT	WT	N/A	N/A	N/A	G12C	medium	Yes	Yes
TSP, Nature 2008	16628	Smoker	WILD TYPE	MUTANT	WT	N/A	N/A	N/A	G12C	medium	Yes	Yes
TSP, Nature 2008	16632	Smoker	WILD TYPE	MUTANT	WT	N/A	N/A	N/A	G12C	medium	Yes	Yes
TSP, Nature 2008	16772	Smoker	WILD TYPE	MUTANT	WT	N/A	N/A	N/A	G12C	medium	Yes	Yes
TSP, Nature 2008	16857	Smoker	WILD TYPE	MUTANT	WT	N/A	N/A	N/A	G12C	medium	Yes	Yes
TSP, Nature 2008	16859	Smoker	WILD TYPE	MUTANT	WT	N/A	N/A	N/A	G12C	medium	Yes	Yes
TSP, Nature 2008	16879	Smoker	WILD TYPE	MUTANT	WT	N/A	N/A	N/A	G12C	medium	Yes	Yes
TSP, Nature 2008	16909	Smoker	WILD TYPE	MUTANT	WT	N/A	N/A	N/A	G12C	medium	Yes	Yes
TSP, Nature 2008	16921	Smoker	WILD TYPE	MUTANT	WT	N/A	N/A	N/A	G12C	medium	Yes	Yes
TSP, Nature 2008	17055	Smoker	WILD TYPE	MUTANT	WT	N/A	N/A	N/A	G12C	medium	Yes	Yes
TSP, Nature 2008	17060	Smoker	WILD TYPE	MUTANT	WT	N/A	N/A	N/A	G12C	medium	Yes	Yes
TSP, Nature 2008	17154	Smoker	WILD TYPE	MUTANT	WT	N/A	N/A	N/A	G12C	medium	Yes	Yes
TSP, Nature 2008	17158	Smoker	WILD TYPE	MUTANT	WT	N/A	N/A	N/A	G12C	medium	Yes	Yes
TSP, Nature 2008	17186	Smoker	WILD TYPE	MUTANT	WT	N/A	N/A	N/A	G12C	medium	Yes	Yes
TSP, Nature 2008	17210	Smoker	WILD TYPE	MUTANT	WT	N/A	N/A	N/A	G12C	medium	Yes	Yes
TSP, Nature 2008	17222	Smoker	WILD TYPE	MUTANT	WT	N/A	N/A	N/A	G12C	medium	Yes	Yes
TSP, Nature 2008	17250	Smoker	WILD TYPE	MUTANT	WT	N/A	N/A	N/A	G12C	medium	Yes	Yes
TSP, Nature 2008	17324	Smoker	WILD TYPE	MUTANT	WT	N/A	N/A	N/A	G12C	medium	Yes	Yes
Seo et al.. Genome Research 2012	LC_S14	Smoker	WILD TYPE	MUTANT	WT	N/A	N/A	N/A	G12C	medium	Yes	Yes
Seo et al.. Genome Research 2012	LC_S18	Smoker	WILD TYPE	MUTANT	WT	N/A	N/A	N/A	G12C	medium	Yes	Yes
TSP, Nature 2008	17272	Smoker	WILD TYPE	MUTANT	WT	N/A	N/A	N/A	G12C,G12A	medium,medium	Yes,Yes	Yes,Yes
Seo et al.. Genome Research 2012	LC_S28	Never Smoker	WILD TYPE	MUTANT	WT	N/A	N/A	N/A	G12D	medium	Yes	Yes
TCGA Provisional	TCGA-17-Z060	Not Available	WILD TYPE	MUTANT	WT	N/A	N/A	N/A	G12D	medium	Yes	Yes
Broad, Cell 2012	LUAD-CHTN-3090346	Not Available	WILD TYPE	MUTANT	WT	N/A	N/A	N/A	G12D	medium	Yes	Yes
TSP, Nature 2008	17727	Not Available	WILD TYPE	MUTANT	WT	N/A	N/A	N/A	G12D	medium	Yes	Yes
TSP, Nature 2008	17733	Not Available	WILD TYPE	MUTANT	WT	N/A	N/A	N/A	G12D	medium	Yes	Yes
TSP, Nature 2008	17760	Not Available	WILD TYPE	MUTANT	WT	N/A	N/A	N/A	G12D	medium	Yes	Yes
TCGA Provisional	TCGA-44-6776	Smoker	WILD TYPE	MUTANT	WT	N/A	N/A	N/A	G12D	medium	Yes	Yes
TCGA Provisional	TCGA-49-4510	Smoker	WILD TYPE	MUTANT	WT	N/A	N/A	N/A	G12D	medium	Yes	Yes
Broad, Cell 2012	LUAD-B00915	Smoker	WILD TYPE	MUTANT	WT	N/A	N/A	N/A	G12D	medium	Yes	Yes
Broad, Cell 2012	LUAD-S01482	Smoker	WILD TYPE	MUTANT	WT	N/A	N/A	N/A	G12D	medium	Yes	Yes
TSP, Nature 2008	16827	Smoker	WILD TYPE	MUTANT	WT	N/A	N/A	N/A	G12D	medium	Yes	Yes
TSP, Nature 2008	16907	Smoker	WILD TYPE	MUTANT	WT	N/A	N/A	N/A	G12D	medium	Yes	Yes
TSP, Nature 2008	17216	Smoker	WILD TYPE	MUTANT	WT	N/A	N/A	N/A	G12D	medium	Yes	Yes
TSP, Nature 2008	17264	Smoker	WILD TYPE	MUTANT	WT	N/A	N/A	N/A	G12D	medium	Yes	Yes
Seo et al.. Genome Research 2012	LC_S52	Smoker	WILD TYPE	MUTANT	WT	N/A	N/A	N/A	G12D	medium	Yes	Yes
TSP, Nature 2008	17728	Not Available	WILD TYPE	MUTANT	WT	N/A	N/A	N/A	G12F	medium	Yes	Yes
TCGA Provisional	TCGA-67-3774	Smoker	WILD TYPE	MUTANT	WT	N/A	N/A	N/A	G12F	medium	Yes	Yes
TSP, Nature 2008	16660	Smoker	WILD TYPE	MUTANT	WT	N/A	N/A	N/A	G12F	medium	Yes	Yes
TSP, Nature 2008	17206	Smoker	WILD TYPE	MUTANT	WT	N/A	N/A	N/A	G12F	medium	Yes	Yes
TSP, Nature 2008	17174	Smoker	WILD TYPE	MUTANT	WT	N/A	N/A	N/A	G12R	medium	Yes	Yes
Seo et al.. Genome Research 2012	LC_C23	Not Available	WILD TYPE	MUTANT	WT	N/A	N/A	N/A	G12S	low	Yes	Yes
Broad, Cell 2012	LUAD-RT-S01477	Smoker	WILD TYPE	MUTANT	WT	N/A	N/A	N/A	G12S	low	Yes	Yes
TSP, Nature 2008	17268	Smoker	WILD TYPE	MUTANT	WT	N/A	N/A	N/A	G12S	low	Yes	Yes
TSP, Nature 2008	17304	Smoker	WILD TYPE	MUTANT	WT	N/A	N/A	N/A	G12S	low	Yes	Yes
TSP, Nature 2008	17150	Never Smoker	WILD TYPE	MUTANT	WT	N/A	N/A	N/A	G12V	medium	Yes	Yes
Seo et al.. Genome Research 2012	LC_S30	Never Smoker	WILD TYPE	MUTANT	WT	N/A	N/A	N/A	G12V	medium	Yes	Yes
Seo et al.. Genome Research 2012	LC_S36	Never Smoker	WILD TYPE	MUTANT	WT	N/A	N/A	N/A	G12V	medium	Yes	Yes
Seo et al.. Genome Research 2012	LC_S44	Never Smoker	WILD TYPE	MUTANT	WT	N/A	N/A	N/A	G12V	medium	Yes	Yes
TCGA Provisional	TCGA-17-Z010	Not Available	WILD TYPE	MUTANT	WT	N/A	N/A	N/A	G12V	medium	Yes	Yes
TCGA Provisional	TCGA-17-Z020	Not Available	WILD TYPE	MUTANT	WT	N/A	N/A	N/A	G12V	medium	Yes	Yes
TCGA Provisional	TCGA-17-Z033	Not Available	WILD TYPE	MUTANT	WT	N/A	N/A	N/A	G12V	medium	Yes	Yes
TCGA Provisional	TCGA-17-Z050	Not Available	WILD TYPE	MUTANT	WT	N/A	N/A	N/A	G12V	medium	Yes	Yes
TSP, Nature 2008	16861	Not Available	WILD TYPE	MUTANT	WT	N/A	N/A	N/A	G12V	medium	Yes	Yes
TCGA Provisional	TCGA-05-4390	Smoker	WILD TYPE	MUTANT	WT	N/A	N/A	N/A	G12V	medium	Yes	Yes
TCGA Provisional	TCGA-05-4427	Smoker	WILD TYPE	MUTANT	WT	N/A	N/A	N/A	G12V	medium	Yes	Yes
TCGA Provisional	TCGA-44-6145	Smoker	WILD TYPE	MUTANT	WT	N/A	N/A	N/A	G12V	medium	Yes	Yes
TCGA Provisional	TCGA-05-4395	Smoker	WILD TYPE	MUTANT	WT	N/A	N/A	N/A	G12V	medium	Yes	Yes
TCGA Provisional	TCGA-05-4433	Smoker	WILD TYPE	MUTANT	WT	N/A	N/A	N/A	G12V	medium	Yes	Yes
TCGA Provisional	TCGA-44-6146	Smoker	WILD TYPE	MUTANT	WT	N/A	N/A	N/A	G12V	medium	Yes	Yes
TCGA Provisional	TCGA-67-3773	Smoker	WILD TYPE	MUTANT	WT	N/A	N/A	N/A	G12V	medium	Yes	Yes
TCGA Provisional	TCGA-73-4659	Smoker	WILD TYPE	MUTANT	WT	N/A	N/A	N/A	G12V	medium	Yes	Yes
TCGA Provisional	TCGA-91-6828	Smoker	WILD TYPE	MUTANT	WT	N/A	N/A	N/A	G12V	medium	Yes	Yes
TCGA Provisional	TCGA-38-4626	Smoker	WILD TYPE	MUTANT	WT	N/A	N/A	N/A	G12V	medium	Yes	Yes
TCGA Provisional	TCGA-55-6642	Smoker	WILD TYPE	MUTANT	WT	N/A	N/A	N/A	G12V	medium	Yes	Yes
Broad, Cell 2012	LUAD_E00623	Smoker	WILD TYPE	MUTANT	WT	N/A	N/A	N/A	G12V	medium	Yes	Yes
Broad, Cell 2012	LUAD-E01278	Smoker	WILD TYPE	MUTANT	WT	N/A	N/A	N/A	G12V	medium	Yes	Yes
Broad, Cell 2012	LUAD-S00484	Smoker	WILD TYPE	MUTANT	WT	N/A	N/A	N/A	G12V	medium	Yes	Yes
Broad, Cell 2012	LUAD-S01354	Smoker	WILD TYPE	MUTANT	WT	N/A	N/A	N/A	G12V	medium	Yes	Yes
TSP, Nature 2008	16748	Smoker	WILD TYPE	MUTANT	WT	N/A	N/A	N/A	G12V	medium	Yes	Yes
TSP, Nature 2008	16802	Smoker	WILD TYPE	MUTANT	WT	N/A	N/A	N/A	G12V	medium	Yes	Yes
TSP, Nature 2008	17146	Smoker	WILD TYPE	MUTANT	WT	N/A	N/A	N/A	G12V	medium	Yes	Yes
TSP, Nature 2008	17292	Smoker	WILD TYPE	MUTANT	WT	N/A	N/A	N/A	G12V	medium	Yes	Yes
TSP, Nature 2008	17316	Smoker	WILD TYPE	MUTANT	WT	N/A	N/A	N/A	G12V	medium	Yes	Yes
Seo et al.. Genome Research 2012	LC_C13	Smoker	WILD TYPE	MUTANT	WT	N/A	N/A	N/A	G12V	medium	Yes	Yes
Seo et al.. Genome Research 2012	LC_S21	Smoker	WILD TYPE	MUTANT	WT	N/A	N/A	N/A	G12V	medium	Yes	Yes
Seo et al.. Genome Research 2012	LC_S32	Smoker	WILD TYPE	MUTANT	WT	N/A	N/A	N/A	G12V	medium	Yes	Yes
Seo et al.. Genome Research 2012	LC_S45	Never Smoker	WILD TYPE	MUTANT	WT	N/A	N/A	N/A	G13C	medium	Yes	Yes
TCGA Provisional	TCGA-17-Z017	Not Available	WILD TYPE	MUTANT	WT	N/A	N/A	N/A	G13C	medium	Yes	Yes
Broad, Cell 2012	LUAD-D01603	Not Available	WILD TYPE	MUTANT	WT	N/A	N/A	N/A	G13C	medium	Yes	Yes
TSP, Nature 2008	16881	Not Available	WILD TYPE	MUTANT	WT	N/A	N/A	N/A	G13C	medium	Yes	Yes
TSP, Nature 2008	17731	Not Available	WILD TYPE	MUTANT	WT	N/A	N/A	N/A	G13C	medium	Yes	Yes
Broad, Cell 2012	LUAD-B02077	Smoker	WILD TYPE	MUTANT	WT	N/A	N/A	N/A	G13C	medium	Yes	Yes
Broad, Cell 2012	LUAD-S01357	Smoker	WILD TYPE	MUTANT	WT	N/A	N/A	N/A	G13C	medium	Yes	Yes
TSP, Nature 2008	16608	Smoker	WILD TYPE	MUTANT	WT	N/A	N/A	N/A	G13C	medium	Yes	Yes
TSP, Nature 2008	16919	Smoker	WILD TYPE	MUTANT	WT	N/A	N/A	N/A	G13C	medium	Yes	Yes
TSP, Nature 2008	17042	Smoker	WILD TYPE	MUTANT	WT	N/A	N/A	N/A	G13C	medium	Yes	Yes
TSP, Nature 2008	17242	Smoker	WILD TYPE	MUTANT	WT	N/A	N/A	N/A	G13C	medium	Yes	Yes
TSP, Nature 2008	17262	Smoker	WILD TYPE	MUTANT	WT	N/A	N/A	N/A	G13C	medium	Yes	Yes
Seo et al.. Genome Research 2012	LC_S15	Smoker	WILD TYPE	MUTANT	WT	N/A	N/A	N/A	G13C	medium	Yes	Yes
Seo et al.. Genome Research 2012	LC_C4	Never Smoker	WILD TYPE	MUTANT	WT	N/A	N/A	N/A	G13D	medium	Yes	Yes
Broad, Cell 2012	LUAD-CHTN-MAD04-00674	Not Available	WILD TYPE	MUTANT	WT	N/A	N/A	N/A	G13D	medium	Yes	Yes
TCGA Provisional	TCGA-75-6206	Smoker	WILD TYPE	MUTANT	WT	N/A	N/A	N/A	G13D	medium	Yes	Yes
Broad, Cell 2012	LUAD-NYU1195	Smoker	WILD TYPE	MUTANT	WT	N/A	N/A	N/A	G13D	medium	Yes	Yes
Broad, Cell 2012	LUAD-NYU669	Smoker	WILD TYPE	MUTANT	WT	N/A	N/A	N/A	G13D	medium	Yes	Yes
Broad, Cell 2012	LUAD-VUMN6	Smoker	WILD TYPE	MUTANT	WT	N/A	N/A	N/A	G13D	medium	Yes	Yes
TSP, Nature 2008	17286	Smoker	WILD TYPE	MUTANT	WT	N/A	N/A	N/A	G13D	medium	Yes	Yes
TSP, Nature 2008	17330	Smoker	WILD TYPE	MUTANT	WT	N/A	N/A	N/A	G13D	medium	Yes	Yes
Seo et al.. Genome Research 2012	LC_C33	Not Available	WILD TYPE	MUTANT	WT	N/A	N/A	N/A	G13D, G12C	medium,medium	Yes,Yes	Yes,Yes
Broad, Cell 2012	LUAD-NYU575	Never Smoker	WILD TYPE	MUTANT	WT	N/A	N/A	N/A	G13V	high	Yes	Yes
Broad, Cell 2012	LUAD-F00282	Not Available	WILD TYPE	MUTANT	WT	N/A	N/A	N/A	Q61H	medium	Yes	Yes
Broad, Cell 2012	LUAD-S00486	Smoker	WILD TYPE	MUTANT	WT	N/A	N/A	N/A	Q61H	medium	Yes	Yes
TCGA Provisional	TCGA-17-Z014	Not Available	WILD TYPE	MUTANT	WT	N/A	N/A	N/A	Q61L	high	Yes	Yes
TSP, Nature 2008	16875	Not Available	WILD TYPE	MUTANT	WT	N/A	N/A	N/A	Q61L	high	Yes	Yes
TCGA Provisional	TCGA-64-5815	Smoker	WILD TYPE	MUTANT	WT	N/A	N/A	N/A	Q61L	high	Yes	Yes
TCGA Provisional	TCGA-64-5775	Smoker	WILD TYPE	MUTANT	WT	N/A	N/A	N/A	Q61L	high	Yes	Yes
TCGA Provisional	TCGA-05-5429	Never Smoker	WILD TYPE	WILD TYPE	WT	N/A	N/A	N/A	WT	N/A	N/A	N/A
TCGA Provisional	TCGA-05-5715	Never Smoker	WILD TYPE	WILD TYPE	WT	N/A	N/A	N/A	WT	N/A	N/A	N/A
TCGA Provisional	TCGA-38-4630	Never Smoker	WILD TYPE	WILD TYPE	WT	N/A	N/A	N/A	WT	N/A	N/A	N/A
TCGA Provisional	TCGA-44-2661	Never Smoker	WILD TYPE	WILD TYPE	WT	N/A	N/A	N/A	WT	N/A	N/A	N/A
TCGA Provisional	TCGA-44-2665	Never Smoker	WILD TYPE	WILD TYPE	WT	N/A	N/A	N/A	WT	N/A	N/A	N/A
TCGA Provisional	TCGA-44-3919	Never Smoker	WILD TYPE	WILD TYPE	WT	N/A	N/A	N/A	WT	N/A	N/A	N/A
TCGA Provisional	TCGA-49-4512	Never Smoker	WILD TYPE	WILD TYPE	WT	N/A	N/A	N/A	WT	N/A	N/A	N/A
TCGA Provisional	TCGA-50-5066	Never Smoker	WILD TYPE	WILD TYPE	WT	N/A	N/A	N/A	WT	N/A	N/A	N/A
TCGA Provisional	TCGA-50-6597	Never Smoker	WILD TYPE	WILD TYPE	WT	N/A	N/A	N/A	WT	N/A	N/A	N/A
TCGA Provisional	TCGA-67-6215	Never Smoker	WILD TYPE	WILD TYPE	WT	N/A	N/A	N/A	WT	N/A	N/A	N/A
TCGA Provisional	TCGA-67-6216	Never Smoker	WILD TYPE	WILD TYPE	WT	N/A	N/A	N/A	WT	N/A	N/A	N/A
TCGA Provisional	TCGA-75-5147	Never Smoker	WILD TYPE	WILD TYPE	WT	N/A	N/A	N/A	WT	N/A	N/A	N/A
TCGA Provisional	TCGA-75-6203	Never Smoker	WILD TYPE	WILD TYPE	WT	N/A	N/A	N/A	WT	N/A	N/A	N/A
TCGA Provisional	TCGA-75-6205	Never Smoker	WILD TYPE	WILD TYPE	WT	N/A	N/A	N/A	WT	N/A	N/A	N/A
TCGA Provisional	TCGA-86-6562	Never Smoker	WILD TYPE	WILD TYPE	WT	N/A	N/A	N/A	WT	N/A	N/A	N/A
Broad, Cell 2012	LUAD-5O6B5	Never Smoker	WILD TYPE	WILD TYPE	WT	N/A	N/A	N/A	WT	N/A	N/A	N/A
Broad, Cell 2012	LUAD-B01102	Never Smoker	WILD TYPE	WILD TYPE	WT	N/A	N/A	N/A	WT	N/A	N/A	N/A
Broad, Cell 2012	LUAD-D02326	Never Smoker	WILD TYPE	WILD TYPE	WT	N/A	N/A	N/A	WT	N/A	N/A	N/A
Broad, Cell 2012	LUAD-NYU1027	Never Smoker	WILD TYPE	WILD TYPE	WT	N/A	N/A	N/A	WT	N/A	N/A	N/A
Broad, Cell 2012	LUAD-NYU1124	Never Smoker	WILD TYPE	WILD TYPE	WT	N/A	N/A	N/A	WT	N/A	N/A	N/A
Broad, Cell 2012	LUAD-NYU1128	Never Smoker	WILD TYPE	WILD TYPE	WT	N/A	N/A	N/A	WT	N/A	N/A	N/A
Broad, Cell 2012	LUAD-NYU1177	Never Smoker	WILD TYPE	WILD TYPE	WT	N/A	N/A	N/A	WT	N/A	N/A	N/A
Broad, Cell 2012	LUAD-NYU195	Never Smoker	WILD TYPE	WILD TYPE	WT	N/A	N/A	N/A	WT	N/A	N/A	N/A
Broad, Cell 2012	LUAD-NYU279	Never Smoker	WILD TYPE	WILD TYPE	WT	N/A	N/A	N/A	WT	N/A	N/A	N/A
Broad, Cell 2012	LUAD-NYU574S	Never Smoker	WILD TYPE	WILD TYPE	WT	N/A	N/A	N/A	WT	N/A	N/A	N/A
Broad, Cell 2012	LUAD-NYU796	Never Smoker	WILD TYPE	WILD TYPE	WT	N/A	N/A	N/A	WT	N/A	N/A	N/A
Broad, Cell 2012	LUAD-NYU803	Never Smoker	WILD TYPE	WILD TYPE	WT	N/A	N/A	N/A	WT	N/A	N/A	N/A
Broad, Cell 2012	LUAD-NYU846	Never Smoker	WILD TYPE	WILD TYPE	WT	N/A	N/A	N/A	WT	N/A	N/A	N/A
Broad, Cell 2012	LUAD-S01320	Never Smoker	WILD TYPE	WILD TYPE	WT	N/A	N/A	N/A	WT	N/A	N/A	N/A
Broad, Cell 2012	LUAD-UF7HM	Never Smoker	WILD TYPE	WILD TYPE	WT	N/A	N/A	N/A	WT	N/A	N/A	N/A
TSP, Nature 2008	16606	Never Smoker	WILD TYPE	WILD TYPE	WT	N/A	N/A	N/A	WT	N/A	N/A	N/A
TSP, Nature 2008	16646	Never Smoker	WILD TYPE	WILD TYPE	WT	N/A	N/A	N/A	WT	N/A	N/A	N/A
TSP, Nature 2008	16696	Never Smoker	WILD TYPE	WILD TYPE	WT	N/A	N/A	N/A	WT	N/A	N/A	N/A
TSP, Nature 2008	16742	Never Smoker	WILD TYPE	WILD TYPE	WT	N/A	N/A	N/A	WT	N/A	N/A	N/A
TSP, Nature 2008	16774	Never Smoker	WILD TYPE	WILD TYPE	WT	N/A	N/A	N/A	WT	N/A	N/A	N/A
TSP, Nature 2008	16993	Never Smoker	WILD TYPE	WILD TYPE	WT	N/A	N/A	N/A	WT	N/A	N/A	N/A
TSP, Nature 2008	17326	Never Smoker	WILD TYPE	WILD TYPE	WT	N/A	N/A	N/A	WT	N/A	N/A	N/A
Seo et al.. Genome Research 2012	LC_C17	Never Smoker	WILD TYPE	WILD TYPE	WT	N/A	N/A	N/A	WT	N/A	N/A	N/A
Seo et al.. Genome Research 2012	LC_C19	Never Smoker	WILD TYPE	WILD TYPE	WT	N/A	N/A	N/A	WT	N/A	N/A	N/A
Seo et al.. Genome Research 2012	LC_C28	Never Smoker	WILD TYPE	WILD TYPE	WT	N/A	N/A	N/A	WT	N/A	N/A	N/A
Seo et al.. Genome Research 2012	LC_C31	Never Smoker	WILD TYPE	WILD TYPE	WT	N/A	N/A	N/A	WT	N/A	N/A	N/A
Seo et al.. Genome Research 2012	LC_S2	Never Smoker	WILD TYPE	WILD TYPE	WT	N/A	N/A	N/A	WT	N/A	N/A	N/A
Seo et al.. Genome Research 2012	LC_S22	Never Smoker	WILD TYPE	WILD TYPE	WT	N/A	N/A	N/A	WT	N/A	N/A	N/A
Seo et al.. Genome Research 2012	LC_S23	Never Smoker	WILD TYPE	WILD TYPE	WT	N/A	N/A	N/A	WT	N/A	N/A	N/A
Seo et al.. Genome Research 2012	LC_S26	Never Smoker	WILD TYPE	WILD TYPE	WT	N/A	N/A	N/A	WT	N/A	N/A	N/A
Seo et al.. Genome Research 2012	LC_S33	Never Smoker	WILD TYPE	WILD TYPE	WT	N/A	N/A	N/A	WT	N/A	N/A	N/A
Seo et al.. Genome Research 2012	LC_S34	Never Smoker	WILD TYPE	WILD TYPE	WT	N/A	N/A	N/A	WT	N/A	N/A	N/A
Seo et al.. Genome Research 2012	LC_S4	Never Smoker	WILD TYPE	WILD TYPE	WT	N/A	N/A	N/A	WT	N/A	N/A	N/A
Seo et al.. Genome Research 2012	LC_S42	Never Smoker	WILD TYPE	WILD TYPE	WT	N/A	N/A	N/A	WT	N/A	N/A	N/A
Seo et al.. Genome Research 2012	LC_S43	Never Smoker	WILD TYPE	WILD TYPE	WT	N/A	N/A	N/A	WT	N/A	N/A	N/A
Seo et al.. Genome Research 2012	LC_S47	Never Smoker	WILD TYPE	WILD TYPE	WT	N/A	N/A	N/A	WT	N/A	N/A	N/A
Seo et al.. Genome Research 2012	LC_S48	Never Smoker	WILD TYPE	WILD TYPE	WT	N/A	N/A	N/A	WT	N/A	N/A	N/A
Seo et al.. Genome Research 2012	LC_S49	Never Smoker	WILD TYPE	WILD TYPE	WT	N/A	N/A	N/A	WT	N/A	N/A	N/A
Seo et al.. Genome Research 2012	LC_S8	Never Smoker	WILD TYPE	WILD TYPE	WT	N/A	N/A	N/A	WT	N/A	N/A	N/A
TCGA Provisional	TCGA-17-Z000	Not Available	WILD TYPE	WILD TYPE	WT	N/A	N/A	N/A	WT	N/A	N/A	N/A
TCGA Provisional	TCGA-17-Z001	Not Available	WILD TYPE	WILD TYPE	WT	N/A	N/A	N/A	WT	N/A	N/A	N/A
TCGA Provisional	TCGA-17-Z003	Not Available	WILD TYPE	WILD TYPE	WT	N/A	N/A	N/A	WT	N/A	N/A	N/A
TCGA Provisional	TCGA-17-Z004	Not Available	WILD TYPE	WILD TYPE	WT	N/A	N/A	N/A	WT	N/A	N/A	N/A
TCGA Provisional	TCGA-17-Z005	Not Available	WILD TYPE	WILD TYPE	WT	N/A	N/A	N/A	WT	N/A	N/A	N/A
TCGA Provisional	TCGA-17-Z007	Not Available	WILD TYPE	WILD TYPE	WT	N/A	N/A	N/A	WT	N/A	N/A	N/A
TCGA Provisional	TCGA-17-Z009	Not Available	WILD TYPE	WILD TYPE	WT	N/A	N/A	N/A	WT	N/A	N/A	N/A
TCGA Provisional	TCGA-17-Z011	Not Available	WILD TYPE	WILD TYPE	WT	N/A	N/A	N/A	WT	N/A	N/A	N/A
TCGA Provisional	TCGA-17-Z012	Not Available	WILD TYPE	WILD TYPE	WT	N/A	N/A	N/A	WT	N/A	N/A	N/A
TCGA Provisional	TCGA-17-Z013	Not Available	WILD TYPE	WILD TYPE	WT	N/A	N/A	N/A	WT	N/A	N/A	N/A
TCGA Provisional	TCGA-17-Z015	Not Available	WILD TYPE	WILD TYPE	WT	N/A	N/A	N/A	WT	N/A	N/A	N/A
TCGA Provisional	TCGA-17-Z018	Not Available	WILD TYPE	WILD TYPE	WT	N/A	N/A	N/A	WT	N/A	N/A	N/A
TCGA Provisional	TCGA-17-Z021	Not Available	WILD TYPE	WILD TYPE	WT	N/A	N/A	N/A	WT	N/A	N/A	N/A
TCGA Provisional	TCGA-17-Z023	Not Available	WILD TYPE	WILD TYPE	WT	N/A	N/A	N/A	WT	N/A	N/A	N/A
TCGA Provisional	TCGA-17-Z025	Not Available	WILD TYPE	WILD TYPE	WT	N/A	N/A	N/A	WT	N/A	N/A	N/A
TCGA Provisional	TCGA-17-Z027	Not Available	WILD TYPE	WILD TYPE	WT	N/A	N/A	N/A	WT	N/A	N/A	N/A
TCGA Provisional	TCGA-17-Z028	Not Available	WILD TYPE	WILD TYPE	WT	N/A	N/A	N/A	WT	N/A	N/A	N/A
TCGA Provisional	TCGA-17-Z030	Not Available	WILD TYPE	WILD TYPE	WT	N/A	N/A	N/A	WT	N/A	N/A	N/A
TCGA Provisional	TCGA-17-Z031	Not Available	WILD TYPE	WILD TYPE	WT	N/A	N/A	N/A	WT	N/A	N/A	N/A
TCGA Provisional	TCGA-17-Z038	Not Available	WILD TYPE	WILD TYPE	WT	N/A	N/A	N/A	WT	N/A	N/A	N/A
TCGA Provisional	TCGA-17-Z039	Not Available	WILD TYPE	WILD TYPE	WT	N/A	N/A	N/A	WT	N/A	N/A	N/A
TCGA Provisional	TCGA-17-Z040	Not Available	WILD TYPE	WILD TYPE	WT	N/A	N/A	N/A	WT	N/A	N/A	N/A
TCGA Provisional	TCGA-17-Z041	Not Available	WILD TYPE	WILD TYPE	WT	N/A	N/A	N/A	WT	N/A	N/A	N/A
TCGA Provisional	TCGA-17-Z043	Not Available	WILD TYPE	WILD TYPE	WT	N/A	N/A	N/A	WT	N/A	N/A	N/A
TCGA Provisional	TCGA-17-Z044	Not Available	WILD TYPE	WILD TYPE	WT	N/A	N/A	N/A	WT	N/A	N/A	N/A
TCGA Provisional	TCGA-17-Z045	Not Available	WILD TYPE	WILD TYPE	WT	N/A	N/A	N/A	WT	N/A	N/A	N/A
TCGA Provisional	TCGA-17-Z046	Not Available	WILD TYPE	WILD TYPE	WT	N/A	N/A	N/A	WT	N/A	N/A	N/A
TCGA Provisional	TCGA-17-Z049	Not Available	WILD TYPE	WILD TYPE	WT	N/A	N/A	N/A	WT	N/A	N/A	N/A
TCGA Provisional	TCGA-17-Z051	Not Available	WILD TYPE	WILD TYPE	WT	N/A	N/A	N/A	WT	N/A	N/A	N/A
TCGA Provisional	TCGA-17-Z052	Not Available	WILD TYPE	WILD TYPE	WT	N/A	N/A	N/A	WT	N/A	N/A	N/A
TCGA Provisional	TCGA-17-Z053	Not Available	WILD TYPE	WILD TYPE	WT	N/A	N/A	N/A	WT	N/A	N/A	N/A
TCGA Provisional	TCGA-17-Z054	Not Available	WILD TYPE	WILD TYPE	WT	N/A	N/A	N/A	WT	N/A	N/A	N/A
TCGA Provisional	TCGA-17-Z055	Not Available	WILD TYPE	WILD TYPE	WT	N/A	N/A	N/A	WT	N/A	N/A	N/A
TCGA Provisional	TCGA-17-Z056	Not Available	WILD TYPE	WILD TYPE	WT	N/A	N/A	N/A	WT	N/A	N/A	N/A
TCGA Provisional	TCGA-17-Z057	Not Available	WILD TYPE	WILD TYPE	WT	N/A	N/A	N/A	WT	N/A	N/A	N/A
TCGA Provisional	TCGA-17-Z058	Not Available	WILD TYPE	WILD TYPE	WT	N/A	N/A	N/A	WT	N/A	N/A	N/A
TCGA Provisional	TCGA-17-Z059	Not Available	WILD TYPE	WILD TYPE	WT	N/A	N/A	N/A	WT	N/A	N/A	N/A
TCGA Provisional	TCGA-17-Z061	Not Available	WILD TYPE	WILD TYPE	WT	N/A	N/A	N/A	WT	N/A	N/A	N/A
TCGA Provisional	TCGA-17-Z062	Not Available	WILD TYPE	WILD TYPE	WT	N/A	N/A	N/A	WT	N/A	N/A	N/A
TCGA Provisional	TCGA-50-5044	Not Available	WILD TYPE	WILD TYPE	WT	N/A	N/A	N/A	WT	N/A	N/A	N/A
TCGA Provisional	TCGA-50-5045	Not Available	WILD TYPE	WILD TYPE	WT	N/A	N/A	N/A	WT	N/A	N/A	N/A
TCGA Provisional	TCGA-50-5049	Not Available	WILD TYPE	WILD TYPE	WT	N/A	N/A	N/A	WT	N/A	N/A	N/A
TCGA Provisional	TCGA-50-5055	Not Available	WILD TYPE	WILD TYPE	WT	N/A	N/A	N/A	WT	N/A	N/A	N/A
TCGA Provisional	TCGA-50-5068	Not Available	WILD TYPE	WILD TYPE	WT	N/A	N/A	N/A	WT	N/A	N/A	N/A
TCGA Provisional	TCGA-50-5930	Not Available	WILD TYPE	WILD TYPE	WT	N/A	N/A	N/A	WT	N/A	N/A	N/A
TCGA Provisional	TCGA-50-5935	Not Available	WILD TYPE	WILD TYPE	WT	N/A	N/A	N/A	WT	N/A	N/A	N/A
Broad, Cell 2012	LUAD-B01169	Not Available	WILD TYPE	WILD TYPE	WT	N/A	N/A	N/A	WT	N/A	N/A	N/A
Broad, Cell 2012	LUAD-B01811	Not Available	WILD TYPE	WILD TYPE	WT	N/A	N/A	N/A	WT	N/A	N/A	N/A
Broad, Cell 2012	LUAD-CHTN-3090415	Not Available	WILD TYPE	WILD TYPE	WT	N/A	N/A	N/A	WT	N/A	N/A	N/A
Broad, Cell 2012	LUAD-CHTN-3090416	Not Available	WILD TYPE	WILD TYPE	WT	N/A	N/A	N/A	WT	N/A	N/A	N/A
Broad, Cell 2012	LUAD-CHTN-4090680	Not Available	WILD TYPE	WILD TYPE	WT	N/A	N/A	N/A	WT	N/A	N/A	N/A
Broad, Cell 2012	LUAD-CHTN-MAD06-00490	Not Available	WILD TYPE	WILD TYPE	WT	N/A	N/A	N/A	WT	N/A	N/A	N/A
Broad, Cell 2012	LUAD-CHTN-MAD06-00668	Not Available	WILD TYPE	WILD TYPE	WT	N/A	N/A	N/A	WT	N/A	N/A	N/A
Broad, Cell 2012	LUAD-CHTN-MAD08-00104	Not Available	WILD TYPE	WILD TYPE	WT	N/A	N/A	N/A	WT	N/A	N/A	N/A
Broad, Cell 2012	LUAD-CHTN-Z4716A	Not Available	WILD TYPE	WILD TYPE	WT	N/A	N/A	N/A	WT	N/A	N/A	N/A
Broad, Cell 2012	LUAD-D01278	Not Available	WILD TYPE	WILD TYPE	WT	N/A	N/A	N/A	WT	N/A	N/A	N/A
Broad, Cell 2012	LUAD-E01317	Not Available	WILD TYPE	WILD TYPE	WT	N/A	N/A	N/A	WT	N/A	N/A	N/A
Broad, Cell 2012	LUAD-F00170	Not Available	WILD TYPE	WILD TYPE	WT	N/A	N/A	N/A	WT	N/A	N/A	N/A
Broad, Cell 2012	LUAD-F00365	Not Available	WILD TYPE	WILD TYPE	WT	N/A	N/A	N/A	WT	N/A	N/A	N/A
Broad, Cell 2012	LUAD-GU4I3	Not Available	WILD TYPE	WILD TYPE	WT	N/A	N/A	N/A	WT	N/A	N/A	N/A
TSP, Nature 2008	16835	Not Available	WILD TYPE	WILD TYPE	WT	N/A	N/A	N/A	WT	N/A	N/A	N/A
TSP, Nature 2008	16951	Not Available	WILD TYPE	WILD TYPE	WT	N/A	N/A	N/A	WT	N/A	N/A	N/A
TSP, Nature 2008	16953	Not Available	WILD TYPE	WILD TYPE	WT	N/A	N/A	N/A	WT	N/A	N/A	N/A
TSP, Nature 2008	16973	Not Available	WILD TYPE	WILD TYPE	WT	N/A	N/A	N/A	WT	N/A	N/A	N/A
TSP, Nature 2008	17328	Not Available	WILD TYPE	WILD TYPE	WT	N/A	N/A	N/A	WT	N/A	N/A	N/A
TSP, Nature 2008	17726	Not Available	WILD TYPE	WILD TYPE	WT	N/A	N/A	N/A	WT	N/A	N/A	N/A
TSP, Nature 2008	17730	Not Available	WILD TYPE	WILD TYPE	WT	N/A	N/A	N/A	WT	N/A	N/A	N/A
TSP, Nature 2008	17735	Not Available	WILD TYPE	WILD TYPE	WT	N/A	N/A	N/A	WT	N/A	N/A	N/A
TSP, Nature 2008	17738	Not Available	WILD TYPE	WILD TYPE	WT	N/A	N/A	N/A	WT	N/A	N/A	N/A
TSP, Nature 2008	17741	Not Available	WILD TYPE	WILD TYPE	WT	N/A	N/A	N/A	WT	N/A	N/A	N/A
TSP, Nature 2008	17743	Not Available	WILD TYPE	WILD TYPE	WT	N/A	N/A	N/A	WT	N/A	N/A	N/A
TSP, Nature 2008	17745	Not Available	WILD TYPE	WILD TYPE	WT	N/A	N/A	N/A	WT	N/A	N/A	N/A
TSP, Nature 2008	17746	Not Available	WILD TYPE	WILD TYPE	WT	N/A	N/A	N/A	WT	N/A	N/A	N/A
TSP, Nature 2008	17750	Not Available	WILD TYPE	WILD TYPE	WT	N/A	N/A	N/A	WT	N/A	N/A	N/A
TSP, Nature 2008	17754	Not Available	WILD TYPE	WILD TYPE	WT	N/A	N/A	N/A	WT	N/A	N/A	N/A
TSP, Nature 2008	17759	Not Available	WILD TYPE	WILD TYPE	WT	N/A	N/A	N/A	WT	N/A	N/A	N/A
TSP, Nature 2008	17763	Not Available	WILD TYPE	WILD TYPE	WT	N/A	N/A	N/A	WT	N/A	N/A	N/A
TSP, Nature 2008	17769	Not Available	WILD TYPE	WILD TYPE	WT	N/A	N/A	N/A	WT	N/A	N/A	N/A
TSP, Nature 2008	17776	Not Available	WILD TYPE	WILD TYPE	WT	N/A	N/A	N/A	WT	N/A	N/A	N/A
TSP, Nature 2008	17778	Not Available	WILD TYPE	WILD TYPE	WT	N/A	N/A	N/A	WT	N/A	N/A	N/A
TSP, Nature 2008	17784	Not Available	WILD TYPE	WILD TYPE	WT	N/A	N/A	N/A	WT	N/A	N/A	N/A
TCGA Provisional	TCGA-05-4422	Smoker	WILD TYPE	WILD TYPE	WT	N/A	N/A	N/A	WT	N/A	N/A	N/A
TCGA Provisional	TCGA-05-4424	Smoker	WILD TYPE	WILD TYPE	WT	N/A	N/A	N/A	WT	N/A	N/A	N/A
TCGA Provisional	TCGA-05-5420	Smoker	WILD TYPE	WILD TYPE	WT	N/A	N/A	N/A	WT	N/A	N/A	N/A
TCGA Provisional	TCGA-35-4122	Smoker	WILD TYPE	WILD TYPE	WT	N/A	N/A	N/A	WT	N/A	N/A	N/A
TCGA Provisional	TCGA-35-4123	Smoker	WILD TYPE	WILD TYPE	WT	N/A	N/A	N/A	WT	N/A	N/A	N/A
TCGA Provisional	TCGA-35-5375	Smoker	WILD TYPE	WILD TYPE	WT	N/A	N/A	N/A	WT	N/A	N/A	N/A
TCGA Provisional	TCGA-38-4631	Smoker	WILD TYPE	WILD TYPE	WT	N/A	N/A	N/A	WT	N/A	N/A	N/A
TCGA Provisional	TCGA-38-4632	Smoker	WILD TYPE	WILD TYPE	WT	N/A	N/A	N/A	WT	N/A	N/A	N/A
TCGA Provisional	TCGA-44-2656	Smoker	WILD TYPE	WILD TYPE	WT	N/A	N/A	N/A	WT	N/A	N/A	N/A
TCGA Provisional	TCGA-44-2657	Smoker	WILD TYPE	WILD TYPE	WT	N/A	N/A	N/A	WT	N/A	N/A	N/A
TCGA Provisional	TCGA-44-2659	Smoker	WILD TYPE	WILD TYPE	WT	N/A	N/A	N/A	WT	N/A	N/A	N/A
TCGA Provisional	TCGA-44-3398	Smoker	WILD TYPE	WILD TYPE	WT	N/A	N/A	N/A	WT	N/A	N/A	N/A
TCGA Provisional	TCGA-44-6775	Smoker	WILD TYPE	WILD TYPE	WT	N/A	N/A	N/A	WT	N/A	N/A	N/A
TCGA Provisional	TCGA-44-6778	Smoker	WILD TYPE	WILD TYPE	WT	N/A	N/A	N/A	WT	N/A	N/A	N/A
TCGA Provisional	TCGA-44-6779	Smoker	WILD TYPE	WILD TYPE	WT	N/A	N/A	N/A	WT	N/A	N/A	N/A
TCGA Provisional	TCGA-49-4487	Smoker	WILD TYPE	WILD TYPE	WT	N/A	N/A	N/A	WT	N/A	N/A	N/A
TCGA Provisional	TCGA-49-4507	Smoker	WILD TYPE	WILD TYPE	WT	N/A	N/A	N/A	WT	N/A	N/A	N/A
TCGA Provisional	TCGA-49-6743	Smoker	WILD TYPE	WILD TYPE	WT	N/A	N/A	N/A	WT	N/A	N/A	N/A
TCGA Provisional	TCGA-49-6745	Smoker	WILD TYPE	WILD TYPE	WT	N/A	N/A	N/A	WT	N/A	N/A	N/A
TCGA Provisional	TCGA-50-5931	Smoker	WILD TYPE	WILD TYPE	WT	N/A	N/A	N/A	WT	N/A	N/A	N/A
TCGA Provisional	TCGA-50-5942	Smoker	WILD TYPE	WILD TYPE	WT	N/A	N/A	N/A	WT	N/A	N/A	N/A
TCGA Provisional	TCGA-50-5946	Smoker	WILD TYPE	WILD TYPE	WT	N/A	N/A	N/A	WT	N/A	N/A	N/A
TCGA Provisional	TCGA-50-6590	Smoker	WILD TYPE	WILD TYPE	WT	N/A	N/A	N/A	WT	N/A	N/A	N/A
TCGA Provisional	TCGA-50-6592	Smoker	WILD TYPE	WILD TYPE	WT	N/A	N/A	N/A	WT	N/A	N/A	N/A
TCGA Provisional	TCGA-50-6593	Smoker	WILD TYPE	WILD TYPE	WT	N/A	N/A	N/A	WT	N/A	N/A	N/A
TCGA Provisional	TCGA-50-6594	Smoker	WILD TYPE	WILD TYPE	WT	N/A	N/A	N/A	WT	N/A	N/A	N/A
TCGA Provisional	TCGA-55-1592	Smoker	WILD TYPE	WILD TYPE	WT	N/A	N/A	N/A	WT	N/A	N/A	N/A
TCGA Provisional	TCGA-55-6543	Smoker	WILD TYPE	WILD TYPE	WT	N/A	N/A	N/A	WT	N/A	N/A	N/A
TCGA Provisional	TCGA-55-6712	Smoker	WILD TYPE	WILD TYPE	WT	N/A	N/A	N/A	WT	N/A	N/A	N/A
TCGA Provisional	TCGA-64-5779	Smoker	WILD TYPE	WILD TYPE	WT	N/A	N/A	N/A	WT	N/A	N/A	N/A
TCGA Provisional	TCGA-64-5781	Smoker	WILD TYPE	WILD TYPE	WT	N/A	N/A	N/A	WT	N/A	N/A	N/A
TCGA Provisional	TCGA-67-3771	Smoker	WILD TYPE	WILD TYPE	WT	N/A	N/A	N/A	WT	N/A	N/A	N/A
TCGA Provisional	TCGA-73-4666	Smoker	WILD TYPE	WILD TYPE	WT	N/A	N/A	N/A	WT	N/A	N/A	N/A
TCGA Provisional	TCGA-73-4668	Smoker	WILD TYPE	WILD TYPE	WT	N/A	N/A	N/A	WT	N/A	N/A	N/A
TCGA Provisional	TCGA-73-4675	Smoker	WILD TYPE	WILD TYPE	WT	N/A	N/A	N/A	WT	N/A	N/A	N/A
TCGA Provisional	TCGA-73-4676	Smoker	WILD TYPE	WILD TYPE	WT	N/A	N/A	N/A	WT	N/A	N/A	N/A
TCGA Provisional	TCGA-80-5611	Smoker	WILD TYPE	WILD TYPE	WT	N/A	N/A	N/A	WT	N/A	N/A	N/A
TCGA Provisional	TCGA-91-6829	Smoker	WILD TYPE	WILD TYPE	WT	N/A	N/A	N/A	WT	N/A	N/A	N/A
TCGA Provisional	TCGA-05-4384	Smoker	WILD TYPE	WILD TYPE	WT	N/A	N/A	N/A	WT	N/A	N/A	N/A
TCGA Provisional	TCGA-05-4389	Smoker	WILD TYPE	WILD TYPE	WT	N/A	N/A	N/A	WT	N/A	N/A	N/A
TCGA Provisional	TCGA-05-4425	Smoker	WILD TYPE	WILD TYPE	WT	N/A	N/A	N/A	WT	N/A	N/A	N/A
TCGA Provisional	TCGA-05-4426	Smoker	WILD TYPE	WILD TYPE	WT	N/A	N/A	N/A	WT	N/A	N/A	N/A
TCGA Provisional	TCGA-05-5425	Smoker	WILD TYPE	WILD TYPE	WT	N/A	N/A	N/A	WT	N/A	N/A	N/A
TCGA Provisional	TCGA-05-5428	Smoker	WILD TYPE	WILD TYPE	WT	N/A	N/A	N/A	WT	N/A	N/A	N/A
TCGA Provisional	TCGA-44-2655	Smoker	WILD TYPE	WILD TYPE	WT	N/A	N/A	N/A	WT	N/A	N/A	N/A
TCGA Provisional	TCGA-44-2662	Smoker	WILD TYPE	WILD TYPE	WT	N/A	N/A	N/A	WT	N/A	N/A	N/A
TCGA Provisional	TCGA-44-3918	Smoker	WILD TYPE	WILD TYPE	WT	N/A	N/A	N/A	WT	N/A	N/A	N/A
TCGA Provisional	TCGA-44-4112	Smoker	WILD TYPE	WILD TYPE	WT	N/A	N/A	N/A	WT	N/A	N/A	N/A
TCGA Provisional	TCGA-44-5645	Smoker	WILD TYPE	WILD TYPE	WT	N/A	N/A	N/A	WT	N/A	N/A	N/A
TCGA Provisional	TCGA-44-6148	Smoker	WILD TYPE	WILD TYPE	WT	N/A	N/A	N/A	WT	N/A	N/A	N/A
TCGA Provisional	TCGA-49-4486	Smoker	WILD TYPE	WILD TYPE	WT	N/A	N/A	N/A	WT	N/A	N/A	N/A
TCGA Provisional	TCGA-49-4488	Smoker	WILD TYPE	WILD TYPE	WT	N/A	N/A	N/A	WT	N/A	N/A	N/A
TCGA Provisional	TCGA-49-4514	Smoker	WILD TYPE	WILD TYPE	WT	N/A	N/A	N/A	WT	N/A	N/A	N/A
TCGA Provisional	TCGA-49-6742	Smoker	WILD TYPE	WILD TYPE	WT	N/A	N/A	N/A	WT	N/A	N/A	N/A
TCGA Provisional	TCGA-50-5072	Smoker	WILD TYPE	WILD TYPE	WT	N/A	N/A	N/A	WT	N/A	N/A	N/A
TCGA Provisional	TCGA-50-5939	Smoker	WILD TYPE	WILD TYPE	WT	N/A	N/A	N/A	WT	N/A	N/A	N/A
TCGA Provisional	TCGA-64-1678	Smoker	WILD TYPE	WILD TYPE	WT	N/A	N/A	N/A	WT	N/A	N/A	N/A
TCGA Provisional	TCGA-64-1680	Smoker	WILD TYPE	WILD TYPE	WT	N/A	N/A	N/A	WT	N/A	N/A	N/A
TCGA Provisional	TCGA-73-4658	Smoker	WILD TYPE	WILD TYPE	WT	N/A	N/A	N/A	WT	N/A	N/A	N/A
TCGA Provisional	TCGA-75-5122	Smoker	WILD TYPE	WILD TYPE	WT	N/A	N/A	N/A	WT	N/A	N/A	N/A
TCGA Provisional	TCGA-75-5125	Smoker	WILD TYPE	WILD TYPE	WT	N/A	N/A	N/A	WT	N/A	N/A	N/A
TCGA Provisional	TCGA-75-5146	Smoker	WILD TYPE	WILD TYPE	WT	N/A	N/A	N/A	WT	N/A	N/A	N/A
TCGA Provisional	TCGA-05-4397	Smoker	WILD TYPE	WILD TYPE	WT	N/A	N/A	N/A	WT	N/A	N/A	N/A
TCGA Provisional	TCGA-05-4398	Smoker	WILD TYPE	WILD TYPE	WT	N/A	N/A	N/A	WT	N/A	N/A	N/A
TCGA Provisional	TCGA-05-4420	Smoker	WILD TYPE	WILD TYPE	WT	N/A	N/A	N/A	WT	N/A	N/A	N/A
TCGA Provisional	TCGA-05-4432	Smoker	WILD TYPE	WILD TYPE	WT	N/A	N/A	N/A	WT	N/A	N/A	N/A
TCGA Provisional	TCGA-05-4434	Smoker	WILD TYPE	WILD TYPE	WT	N/A	N/A	N/A	WT	N/A	N/A	N/A
TCGA Provisional	TCGA-38-4625	Smoker	WILD TYPE	WILD TYPE	WT	N/A	N/A	N/A	WT	N/A	N/A	N/A
TCGA Provisional	TCGA-44-2666	Smoker	WILD TYPE	WILD TYPE	WT	N/A	N/A	N/A	WT	N/A	N/A	N/A
TCGA Provisional	TCGA-44-3396	Smoker	WILD TYPE	WILD TYPE	WT	N/A	N/A	N/A	WT	N/A	N/A	N/A
TCGA Provisional	TCGA-44-5643	Smoker	WILD TYPE	WILD TYPE	WT	N/A	N/A	N/A	WT	N/A	N/A	N/A
TCGA Provisional	TCGA-44-6774	Smoker	WILD TYPE	WILD TYPE	WT	N/A	N/A	N/A	WT	N/A	N/A	N/A
TCGA Provisional	TCGA-49-4506	Smoker	WILD TYPE	WILD TYPE	WT	N/A	N/A	N/A	WT	N/A	N/A	N/A
TCGA Provisional	TCGA-49-6767	Smoker	WILD TYPE	WILD TYPE	WT	N/A	N/A	N/A	WT	N/A	N/A	N/A
TCGA Provisional	TCGA-55-1594	Smoker	WILD TYPE	WILD TYPE	WT	N/A	N/A	N/A	WT	N/A	N/A	N/A
TCGA Provisional	TCGA-55-1596	Smoker	WILD TYPE	WILD TYPE	WT	N/A	N/A	N/A	WT	N/A	N/A	N/A
TCGA Provisional	TCGA-55-5899	Smoker	WILD TYPE	WILD TYPE	WT	N/A	N/A	N/A	WT	N/A	N/A	N/A
TCGA Provisional	TCGA-64-1676	Smoker	WILD TYPE	WILD TYPE	WT	N/A	N/A	N/A	WT	N/A	N/A	N/A
TCGA Provisional	TCGA-71-6725	Smoker	WILD TYPE	WILD TYPE	WT	N/A	N/A	N/A	WT	N/A	N/A	N/A
TCGA Provisional	TCGA-75-6211	Smoker	WILD TYPE	WILD TYPE	WT	N/A	N/A	N/A	WT	N/A	N/A	N/A
TCGA Provisional	TCGA-91-6831	Smoker	WILD TYPE	WILD TYPE	WT	N/A	N/A	N/A	WT	N/A	N/A	N/A
Broad, Cell 2012	LUAD_E00565	Smoker	WILD TYPE	WILD TYPE	WT	N/A	N/A	N/A	WT	N/A	N/A	N/A
Broad, Cell 2012	LUAD_E00945	Smoker	WILD TYPE	WILD TYPE	WT	N/A	N/A	N/A	WT	N/A	N/A	N/A
Broad, Cell 2012	LUAD_E01047	Smoker	WILD TYPE	WILD TYPE	WT	N/A	N/A	N/A	WT	N/A	N/A	N/A
Broad, Cell 2012	LUAD_E01086	Smoker	WILD TYPE	WILD TYPE	WT	N/A	N/A	N/A	WT	N/A	N/A	N/A
Broad, Cell 2012	LUAD_E01147	Smoker	WILD TYPE	WILD TYPE	WT	N/A	N/A	N/A	WT	N/A	N/A	N/A
Broad, Cell 2012	LUAD-2GUGK	Smoker	WILD TYPE	WILD TYPE	WT	N/A	N/A	N/A	WT	N/A	N/A	N/A
Broad, Cell 2012	LUAD-AEIUF	Smoker	WILD TYPE	WILD TYPE	WT	N/A	N/A	N/A	WT	N/A	N/A	N/A
Broad, Cell 2012	LUAD-B00416	Smoker	WILD TYPE	WILD TYPE	WT	N/A	N/A	N/A	WT	N/A	N/A	N/A
Broad, Cell 2012	LUAD-B02216	Smoker	WILD TYPE	WILD TYPE	WT	N/A	N/A	N/A	WT	N/A	N/A	N/A
Broad, Cell 2012	LUAD-B02477	Smoker	WILD TYPE	WILD TYPE	WT	N/A	N/A	N/A	WT	N/A	N/A	N/A
Broad, Cell 2012	LUAD-B02594	Smoker	WILD TYPE	WILD TYPE	WT	N/A	N/A	N/A	WT	N/A	N/A	N/A
Broad, Cell 2012	LUAD-D01382	Smoker	WILD TYPE	WILD TYPE	WT	N/A	N/A	N/A	WT	N/A	N/A	N/A
Broad, Cell 2012	LUAD-D01751	Smoker	WILD TYPE	WILD TYPE	WT	N/A	N/A	N/A	WT	N/A	N/A	N/A
Broad, Cell 2012	LUAD-D02085	Smoker	WILD TYPE	WILD TYPE	WT	N/A	N/A	N/A	WT	N/A	N/A	N/A
Broad, Cell 2012	LUAD-D02185	Smoker	WILD TYPE	WILD TYPE	WT	N/A	N/A	N/A	WT	N/A	N/A	N/A
Broad, Cell 2012	LUAD-E00897	Smoker	WILD TYPE	WILD TYPE	WT	N/A	N/A	N/A	WT	N/A	N/A	N/A
Broad, Cell 2012	LUAD-E00918	Smoker	WILD TYPE	WILD TYPE	WT	N/A	N/A	N/A	WT	N/A	N/A	N/A
Broad, Cell 2012	LUAD-E00934	Smoker	WILD TYPE	WILD TYPE	WT	N/A	N/A	N/A	WT	N/A	N/A	N/A
Broad, Cell 2012	LUAD-F00057	Smoker	WILD TYPE	WILD TYPE	WT	N/A	N/A	N/A	WT	N/A	N/A	N/A
Broad, Cell 2012	LUAD-F00089	Smoker	WILD TYPE	WILD TYPE	WT	N/A	N/A	N/A	WT	N/A	N/A	N/A
Broad, Cell 2012	LUAD-F00162	Smoker	WILD TYPE	WILD TYPE	WT	N/A	N/A	N/A	WT	N/A	N/A	N/A
Broad, Cell 2012	LUAD-NYU1021	Smoker	WILD TYPE	WILD TYPE	WT	N/A	N/A	N/A	WT	N/A	N/A	N/A
Broad, Cell 2012	LUAD-NYU1026	Smoker	WILD TYPE	WILD TYPE	WT	N/A	N/A	N/A	WT	N/A	N/A	N/A
Broad, Cell 2012	LUAD-NYU1219	Smoker	WILD TYPE	WILD TYPE	WT	N/A	N/A	N/A	WT	N/A	N/A	N/A
Broad, Cell 2012	LUAD-NYU129	Smoker	WILD TYPE	WILD TYPE	WT	N/A	N/A	N/A	WT	N/A	N/A	N/A
Broad, Cell 2012	LUAD-NYU213	Smoker	WILD TYPE	WILD TYPE	WT	N/A	N/A	N/A	WT	N/A	N/A	N/A
Broad, Cell 2012	LUAD-NYU259	Smoker	WILD TYPE	WILD TYPE	WT	N/A	N/A	N/A	WT	N/A	N/A	N/A
Broad, Cell 2012	LUAD-NYU263	Smoker	WILD TYPE	WILD TYPE	WT	N/A	N/A	N/A	WT	N/A	N/A	N/A
Broad, Cell 2012	LUAD-NYU282	Smoker	WILD TYPE	WILD TYPE	WT	N/A	N/A	N/A	WT	N/A	N/A	N/A
Broad, Cell 2012	LUAD-NYU284	Smoker	WILD TYPE	WILD TYPE	WT	N/A	N/A	N/A	WT	N/A	N/A	N/A
Broad, Cell 2012	LUAD-NYU287	Smoker	WILD TYPE	WILD TYPE	WT	N/A	N/A	N/A	WT	N/A	N/A	N/A
Broad, Cell 2012	LUAD-NYU330	Smoker	WILD TYPE	WILD TYPE	WT	N/A	N/A	N/A	WT	N/A	N/A	N/A
Broad, Cell 2012	LUAD-NYU346	Smoker	WILD TYPE	WILD TYPE	WT	N/A	N/A	N/A	WT	N/A	N/A	N/A
Broad, Cell 2012	LUAD-NYU508	Smoker	WILD TYPE	WILD TYPE	WT	N/A	N/A	N/A	WT	N/A	N/A	N/A
Broad, Cell 2012	LUAD-NYU605	Smoker	WILD TYPE	WILD TYPE	WT	N/A	N/A	N/A	WT	N/A	N/A	N/A
Broad, Cell 2012	LUAD-NYU627	Smoker	WILD TYPE	WILD TYPE	WT	N/A	N/A	N/A	WT	N/A	N/A	N/A
Broad, Cell 2012	LUAD-NYU735	Smoker	WILD TYPE	WILD TYPE	WT	N/A	N/A	N/A	WT	N/A	N/A	N/A
Broad, Cell 2012	LUAD-NYU739	Smoker	WILD TYPE	WILD TYPE	WT	N/A	N/A	N/A	WT	N/A	N/A	N/A
Broad, Cell 2012	LUAD-NYU847	Smoker	WILD TYPE	WILD TYPE	WT	N/A	N/A	N/A	WT	N/A	N/A	N/A
Broad, Cell 2012	LUAD-NYU994	Smoker	WILD TYPE	WILD TYPE	WT	N/A	N/A	N/A	WT	N/A	N/A	N/A
Broad, Cell 2012	LUAD-QJN9L	Smoker	WILD TYPE	WILD TYPE	WT	N/A	N/A	N/A	WT	N/A	N/A	N/A
Broad, Cell 2012	LUAD-QY22Z	Smoker	WILD TYPE	WILD TYPE	WT	N/A	N/A	N/A	WT	N/A	N/A	N/A
Broad, Cell 2012	LUAD-RT-S01487	Smoker	WILD TYPE	WILD TYPE	WT	N/A	N/A	N/A	WT	N/A	N/A	N/A
Broad, Cell 2012	LUAD-RT-S01699	Smoker	WILD TYPE	WILD TYPE	WT	N/A	N/A	N/A	WT	N/A	N/A	N/A
Broad, Cell 2012	LUAD-RT-S01700	Smoker	WILD TYPE	WILD TYPE	WT	N/A	N/A	N/A	WT	N/A	N/A	N/A
Broad, Cell 2012	LUAD-RT-S01709	Smoker	WILD TYPE	WILD TYPE	WT	N/A	N/A	N/A	WT	N/A	N/A	N/A
Broad, Cell 2012	LUAD-RT-S01769	Smoker	WILD TYPE	WILD TYPE	WT	N/A	N/A	N/A	WT	N/A	N/A	N/A
Broad, Cell 2012	LUAD-RT-S01774	Smoker	WILD TYPE	WILD TYPE	WT	N/A	N/A	N/A	WT	N/A	N/A	N/A
Broad, Cell 2012	LUAD-RT-S01808	Smoker	WILD TYPE	WILD TYPE	WT	N/A	N/A	N/A	WT	N/A	N/A	N/A
Broad, Cell 2012	LUAD-RT-S01818	Smoker	WILD TYPE	WILD TYPE	WT	N/A	N/A	N/A	WT	N/A	N/A	N/A
Broad, Cell 2012	LUAD-RT-S01831	Smoker	WILD TYPE	WILD TYPE	WT	N/A	N/A	N/A	WT	N/A	N/A	N/A
Broad, Cell 2012	LUAD-RT-S01832	Smoker	WILD TYPE	WILD TYPE	WT	N/A	N/A	N/A	WT	N/A	N/A	N/A
Broad, Cell 2012	LUAD-RT-S01840	Smoker	WILD TYPE	WILD TYPE	WT	N/A	N/A	N/A	WT	N/A	N/A	N/A
Broad, Cell 2012	LUAD-S01302	Smoker	WILD TYPE	WILD TYPE	WT	N/A	N/A	N/A	WT	N/A	N/A	N/A
Broad, Cell 2012	LUAD-S01304	Smoker	WILD TYPE	WILD TYPE	WT	N/A	N/A	N/A	WT	N/A	N/A	N/A
Broad, Cell 2012	LUAD-S01306	Smoker	WILD TYPE	WILD TYPE	WT	N/A	N/A	N/A	WT	N/A	N/A	N/A
Broad, Cell 2012	LUAD-S01341	Smoker	WILD TYPE	WILD TYPE	WT	N/A	N/A	N/A	WT	N/A	N/A	N/A
Broad, Cell 2012	LUAD-S01345	Smoker	WILD TYPE	WILD TYPE	WT	N/A	N/A	N/A	WT	N/A	N/A	N/A
Broad, Cell 2012	LUAD-S01346	Smoker	WILD TYPE	WILD TYPE	WT	N/A	N/A	N/A	WT	N/A	N/A	N/A
Broad, Cell 2012	LUAD-S01356	Smoker	WILD TYPE	WILD TYPE	WT	N/A	N/A	N/A	WT	N/A	N/A	N/A
Broad, Cell 2012	LUAD-S01373	Smoker	WILD TYPE	WILD TYPE	WT	N/A	N/A	N/A	WT	N/A	N/A	N/A
Broad, Cell 2012	LUAD-S01381	Smoker	WILD TYPE	WILD TYPE	WT	N/A	N/A	N/A	WT	N/A	N/A	N/A
Broad, Cell 2012	LUAD-S01405	Smoker	WILD TYPE	WILD TYPE	WT	N/A	N/A	N/A	WT	N/A	N/A	N/A
Broad, Cell 2012	LUAD-S01478	Smoker	WILD TYPE	WILD TYPE	WT	N/A	N/A	N/A	WT	N/A	N/A	N/A
Broad, Cell 2012	LUAD-TLLGS	Smoker	WILD TYPE	WILD TYPE	WT	N/A	N/A	N/A	WT	N/A	N/A	N/A
Broad, Cell 2012	LUAD-YINHD	Smoker	WILD TYPE	WILD TYPE	WT	N/A	N/A	N/A	WT	N/A	N/A	N/A
Broad, Cell 2012	LUAD-YKER9	Smoker	WILD TYPE	WILD TYPE	WT	N/A	N/A	N/A	WT	N/A	N/A	N/A
Broad, Cell 2012	LUAD_E00522	Smoker	WILD TYPE	WILD TYPE	WT	N/A	N/A	N/A	WT	N/A	N/A	N/A
Broad, Cell 2012	LUAD-5V8LT	Smoker	WILD TYPE	WILD TYPE	WT	N/A	N/A	N/A	WT	N/A	N/A	N/A
Broad, Cell 2012	LUAD-B01970	Smoker	WILD TYPE	WILD TYPE	WT	N/A	N/A	N/A	WT	N/A	N/A	N/A
Broad, Cell 2012	LUAD-NYU1051S	Smoker	WILD TYPE	WILD TYPE	WT	N/A	N/A	N/A	WT	N/A	N/A	N/A
Broad, Cell 2012	LUAD-NYU1096	Smoker	WILD TYPE	WILD TYPE	WT	N/A	N/A	N/A	WT	N/A	N/A	N/A
Broad, Cell 2012	LUAD-NYU689	Smoker	WILD TYPE	WILD TYPE	WT	N/A	N/A	N/A	WT	N/A	N/A	N/A
Broad, Cell 2012	LUAD-S01315	Smoker	WILD TYPE	WILD TYPE	WT	N/A	N/A	N/A	WT	N/A	N/A	N/A
TSP, Nature 2008	16594	Smoker	WILD TYPE	WILD TYPE	WT	N/A	N/A	N/A	WT	N/A	N/A	N/A
TSP, Nature 2008	16616	Smoker	WILD TYPE	WILD TYPE	WT	N/A	N/A	N/A	WT	N/A	N/A	N/A
TSP, Nature 2008	16630	Smoker	WILD TYPE	WILD TYPE	WT	N/A	N/A	N/A	WT	N/A	N/A	N/A
TSP, Nature 2008	16636	Smoker	WILD TYPE	WILD TYPE	WT	N/A	N/A	N/A	WT	N/A	N/A	N/A
TSP, Nature 2008	16640	Smoker	WILD TYPE	WILD TYPE	WT	N/A	N/A	N/A	WT	N/A	N/A	N/A
TSP, Nature 2008	16648	Smoker	WILD TYPE	WILD TYPE	WT	N/A	N/A	N/A	WT	N/A	N/A	N/A
TSP, Nature 2008	16664	Smoker	WILD TYPE	WILD TYPE	WT	N/A	N/A	N/A	WT	N/A	N/A	N/A
TSP, Nature 2008	16670	Smoker	WILD TYPE	WILD TYPE	WT	N/A	N/A	N/A	WT	N/A	N/A	N/A
TSP, Nature 2008	16684	Smoker	WILD TYPE	WILD TYPE	WT	N/A	N/A	N/A	WT	N/A	N/A	N/A
TSP, Nature 2008	16686	Smoker	WILD TYPE	WILD TYPE	WT	N/A	N/A	N/A	WT	N/A	N/A	N/A
TSP, Nature 2008	16698	Smoker	WILD TYPE	WILD TYPE	WT	N/A	N/A	N/A	WT	N/A	N/A	N/A
TSP, Nature 2008	16706	Smoker	WILD TYPE	WILD TYPE	WT	N/A	N/A	N/A	WT	N/A	N/A	N/A
TSP, Nature 2008	16712	Smoker	WILD TYPE	WILD TYPE	WT	N/A	N/A	N/A	WT	N/A	N/A	N/A
TSP, Nature 2008	16730	Smoker	WILD TYPE	WILD TYPE	WT	N/A	N/A	N/A	WT	N/A	N/A	N/A
TSP, Nature 2008	16750	Smoker	WILD TYPE	WILD TYPE	WT	N/A	N/A	N/A	WT	N/A	N/A	N/A
TSP, Nature 2008	16754	Smoker	WILD TYPE	WILD TYPE	WT	N/A	N/A	N/A	WT	N/A	N/A	N/A
TSP, Nature 2008	16770	Smoker	WILD TYPE	WILD TYPE	WT	N/A	N/A	N/A	WT	N/A	N/A	N/A
TSP, Nature 2008	16792	Smoker	WILD TYPE	WILD TYPE	WT	N/A	N/A	N/A	WT	N/A	N/A	N/A
TSP, Nature 2008	16800	Smoker	WILD TYPE	WILD TYPE	WT	N/A	N/A	N/A	WT	N/A	N/A	N/A
TSP, Nature 2008	16814	Smoker	WILD TYPE	WILD TYPE	WT	N/A	N/A	N/A	WT	N/A	N/A	N/A
TSP, Nature 2008	16821	Smoker	WILD TYPE	WILD TYPE	WT	N/A	N/A	N/A	WT	N/A	N/A	N/A
TSP, Nature 2008	16823	Smoker	WILD TYPE	WILD TYPE	WT	N/A	N/A	N/A	WT	N/A	N/A	N/A
TSP, Nature 2008	16825	Smoker	WILD TYPE	WILD TYPE	WT	N/A	N/A	N/A	WT	N/A	N/A	N/A
TSP, Nature 2008	16839	Smoker	WILD TYPE	WILD TYPE	WT	N/A	N/A	N/A	WT	N/A	N/A	N/A
TSP, Nature 2008	16845	Smoker	WILD TYPE	WILD TYPE	WT	N/A	N/A	N/A	WT	N/A	N/A	N/A
TSP, Nature 2008	16863	Smoker	WILD TYPE	WILD TYPE	WT	N/A	N/A	N/A	WT	N/A	N/A	N/A
TSP, Nature 2008	16883	Smoker	WILD TYPE	WILD TYPE	WT	N/A	N/A	N/A	WT	N/A	N/A	N/A
TSP, Nature 2008	16901	Smoker	WILD TYPE	WILD TYPE	WT	N/A	N/A	N/A	WT	N/A	N/A	N/A
TSP, Nature 2008	16905	Smoker	WILD TYPE	WILD TYPE	WT	N/A	N/A	N/A	WT	N/A	N/A	N/A
TSP, Nature 2008	16937	Smoker	WILD TYPE	WILD TYPE	WT	N/A	N/A	N/A	WT	N/A	N/A	N/A
TSP, Nature 2008	16947	Smoker	WILD TYPE	WILD TYPE	WT	N/A	N/A	N/A	WT	N/A	N/A	N/A
TSP, Nature 2008	16949	Smoker	WILD TYPE	WILD TYPE	WT	N/A	N/A	N/A	WT	N/A	N/A	N/A
TSP, Nature 2008	17156	Smoker	WILD TYPE	WILD TYPE	WT	N/A	N/A	N/A	WT	N/A	N/A	N/A
TSP, Nature 2008	17170	Smoker	WILD TYPE	WILD TYPE	WT	N/A	N/A	N/A	WT	N/A	N/A	N/A
TSP, Nature 2008	17176	Smoker	WILD TYPE	WILD TYPE	WT	N/A	N/A	N/A	WT	N/A	N/A	N/A
TSP, Nature 2008	17190	Smoker	WILD TYPE	WILD TYPE	WT	N/A	N/A	N/A	WT	N/A	N/A	N/A
TSP, Nature 2008	17194	Smoker	WILD TYPE	WILD TYPE	WT	N/A	N/A	N/A	WT	N/A	N/A	N/A
TSP, Nature 2008	17226	Smoker	WILD TYPE	WILD TYPE	WT	N/A	N/A	N/A	WT	N/A	N/A	N/A
TSP, Nature 2008	17258	Smoker	WILD TYPE	WILD TYPE	WT	N/A	N/A	N/A	WT	N/A	N/A	N/A
TSP, Nature 2008	17282	Smoker	WILD TYPE	WILD TYPE	WT	N/A	N/A	N/A	WT	N/A	N/A	N/A
TSP, Nature 2008	17288	Smoker	WILD TYPE	WILD TYPE	WT	N/A	N/A	N/A	WT	N/A	N/A	N/A
TSP, Nature 2008	17290	Smoker	WILD TYPE	WILD TYPE	WT	N/A	N/A	N/A	WT	N/A	N/A	N/A
TSP, Nature 2008	17294	Smoker	WILD TYPE	WILD TYPE	WT	N/A	N/A	N/A	WT	N/A	N/A	N/A
TSP, Nature 2008	17308	Smoker	WILD TYPE	WILD TYPE	WT	N/A	N/A	N/A	WT	N/A	N/A	N/A
TSP, Nature 2008	17320	Smoker	WILD TYPE	WILD TYPE	WT	N/A	N/A	N/A	WT	N/A	N/A	N/A
Seo et al.. Genome Research 2012	LC_C15	Smoker	WILD TYPE	WILD TYPE	WT	N/A	N/A	N/A	WT	N/A	N/A	N/A
Seo et al.. Genome Research 2012	LC_C18	Smoker	WILD TYPE	WILD TYPE	WT	N/A	N/A	N/A	WT	N/A	N/A	N/A
Seo et al.. Genome Research 2012	LC_C2	Smoker	WILD TYPE	WILD TYPE	WT	N/A	N/A	N/A	WT	N/A	N/A	N/A
Seo et al.. Genome Research 2012	LC_C21	Smoker	WILD TYPE	WILD TYPE	WT	N/A	N/A	N/A	WT	N/A	N/A	N/A
Seo et al.. Genome Research 2012	LC_C25	Smoker	WILD TYPE	WILD TYPE	WT	N/A	N/A	N/A	WT	N/A	N/A	N/A
Seo et al.. Genome Research 2012	LC_C32	Smoker	WILD TYPE	WILD TYPE	WT	N/A	N/A	N/A	WT	N/A	N/A	N/A
Seo et al.. Genome Research 2012	LC_C34	Smoker	WILD TYPE	WILD TYPE	WT	N/A	N/A	N/A	WT	N/A	N/A	N/A
Seo et al.. Genome Research 2012	LC_C6	Smoker	WILD TYPE	WILD TYPE	WT	N/A	N/A	N/A	WT	N/A	N/A	N/A
Seo et al.. Genome Research 2012	LC_C7	Smoker	WILD TYPE	WILD TYPE	WT	N/A	N/A	N/A	WT	N/A	N/A	N/A
Seo et al.. Genome Research 2012	LC_C8	Smoker	WILD TYPE	WILD TYPE	WT	N/A	N/A	N/A	WT	N/A	N/A	N/A
Seo et al.. Genome Research 2012	LC_C9	Smoker	WILD TYPE	WILD TYPE	WT	N/A	N/A	N/A	WT	N/A	N/A	N/A
Seo et al.. Genome Research 2012	LC_S1	Smoker	WILD TYPE	WILD TYPE	WT	N/A	N/A	N/A	WT	N/A	N/A	N/A
Seo et al.. Genome Research 2012	LC_S10	Smoker	WILD TYPE	WILD TYPE	WT	N/A	N/A	N/A	WT	N/A	N/A	N/A
Seo et al.. Genome Research 2012	LC_S11	Smoker	WILD TYPE	WILD TYPE	WT	N/A	N/A	N/A	WT	N/A	N/A	N/A
Seo et al.. Genome Research 2012	LC_S12	Smoker	WILD TYPE	WILD TYPE	WT	N/A	N/A	N/A	WT	N/A	N/A	N/A
Seo et al.. Genome Research 2012	LC_S13	Smoker	WILD TYPE	WILD TYPE	WT	N/A	N/A	N/A	WT	N/A	N/A	N/A
Seo et al.. Genome Research 2012	LC_S17	Smoker	WILD TYPE	WILD TYPE	WT	N/A	N/A	N/A	WT	N/A	N/A	N/A
Seo et al.. Genome Research 2012	LC_S19	Smoker	WILD TYPE	WILD TYPE	WT	N/A	N/A	N/A	WT	N/A	N/A	N/A
Seo et al.. Genome Research 2012	LC_S20	Smoker	WILD TYPE	WILD TYPE	WT	N/A	N/A	N/A	WT	N/A	N/A	N/A
Seo et al.. Genome Research 2012	LC_S27	Smoker	WILD TYPE	WILD TYPE	WT	N/A	N/A	N/A	WT	N/A	N/A	N/A
Seo et al.. Genome Research 2012	LC_S29	Smoker	WILD TYPE	WILD TYPE	WT	N/A	N/A	N/A	WT	N/A	N/A	N/A
Seo et al.. Genome Research 2012	LC_S3	Smoker	WILD TYPE	WILD TYPE	WT	N/A	N/A	N/A	WT	N/A	N/A	N/A
Seo et al.. Genome Research 2012	LC_S37	Smoker	WILD TYPE	WILD TYPE	WT	N/A	N/A	N/A	WT	N/A	N/A	N/A
Seo et al.. Genome Research 2012	LC_S38	Smoker	WILD TYPE	WILD TYPE	WT	N/A	N/A	N/A	WT	N/A	N/A	N/A
Seo et al.. Genome Research 2012	LC_S39	Smoker	WILD TYPE	WILD TYPE	WT	N/A	N/A	N/A	WT	N/A	N/A	N/A
Seo et al.. Genome Research 2012	LC_S40	Smoker	WILD TYPE	WILD TYPE	WT	N/A	N/A	N/A	WT	N/A	N/A	N/A
Seo et al.. Genome Research 2012	LC_S41	Smoker	WILD TYPE	WILD TYPE	WT	N/A	N/A	N/A	WT	N/A	N/A	N/A
Seo et al.. Genome Research 2012	LC_S51	Smoker	WILD TYPE	WILD TYPE	WT	N/A	N/A	N/A	WT	N/A	N/A	N/A
Seo et al.. Genome Research 2012	LC_S6	Smoker	WILD TYPE	WILD TYPE	WT	N/A	N/A	N/A	WT	N/A	N/A	N/A
Seo et al.. Genome Research 2012	LC_S9	Smoker	WILD TYPE	WILD TYPE	WT	N/A	N/A	N/A	WT	N/A	N/A	N/A
Broad, Cell 2012	LUAD-NYU408	Smoker	MUTANT	MUTANT	R574L	low	No	No	G12V	medium	Yes	Yes
TSP, Nature 2008	16668	Smoker	MUTANT	WILD TYPE	P136T	low	No	No	WT	N/A	N/A	N/A
TCGA Provisional	TCGA-05-4396	Smoker	MUTANT	WILD TYPE	R527L	low	No	No	WT	N/A	N/A	N/A
TSP, Nature 2008	16678	Smoker	MUTANT	WILD TYPE	A597T	low	No	No	WT	N/A	N/A	N/A
TCGA Provisional	TCGA-38-4629	Smoker	MUTANT	WILD TYPE	G465R	neutral	No	No	WT	N/A	N/A	N/A
Broad, Cell 2012	LUAD-74TBW	Smoker	MUTANT	WILD TYPE	Q1020H	neutral	No	No	WT	N/A	N/A	N/A
TCGA Provisional	TCGA-05-4410	Smoker	MUTANT	WILD TYPE	R377S	neutral	No	No	WT	N/A	N/A	N/A
Broad, Cell 2012	LUAD-E00163	Never Smoker	MUTANT	WILD TYPE	709_710ET>D	N/A	Yes	Yes	WT	N/A	N/A	N/A
TSP, Nature 2008	16710	Smoker	MUTANT	WILD TYPE	709_710ET>G	N/A	Yes	Yes	WT	N/A	N/A	N/A
TSP, Nature 2008	16963	Never Smoker	MUTANT	WILD TYPE	770_771insGL	N/A	Yes	Yes	WT	N/A	N/A	N/A
TCGA Provisional	TCGA-17-Z048	Not Available	MUTANT	WILD TYPE	770_771insGL	N/A	Yes	Yes	WT	N/A	N/A	N/A
TSP, Nature 2008	17172	Never Smoker	MUTANT	WILD TYPE	770_771insSVD	N/A	Yes	Yes	WT	N/A	N/A	N/A
TSP, Nature 2008	17182	Smoker	MUTANT	WILD TYPE	770_771insSVD	N/A	Yes	Yes	WT	N/A	N/A	N/A
TSP, Nature 2008	17302	Never Smoker	MUTANT	WILD TYPE	772_772P>PTHP	N/A	Yes	Yes	WT	N/A	N/A	N/A
TSP, Nature 2008	16734	Smoker	MUTANT	WILD TYPE	773_774insNPH	N/A	Yes	Yes	WT	N/A	N/A	N/A
Broad, Cell 2012	LU-A08-43	Never Smoker	MUTANT	WILD TYPE	774_775insHV	N/A	Yes	Yes	WT	N/A	N/A	N/A
Seo et al.. Genome Research 2012	LC_C10	Never Smoker	MUTANT	WILD TYPE	E746_A750delELREA	N/A	Yes	Yes	WT	N/A	N/A	N/A
Seo et al.. Genome Research 2012	LC_C1	Smoker	MUTANT	WILD TYPE	E746_S752>D,L747_S752delLREATS,L747S	N/A	Yes	Yes	WT	N/A	N/A	N/A
Seo et al.. Genome Research 2012	LC_C14	Smoker	MUTANT	WILD TYPE	E746_T751delELREAT	N/A	Yes	Yes	WT	N/A	N/A	N/A
Seo et al.. Genome Research 2012	LC_C20	Smoker	MUTANT	WILD TYPE	E746_T751delELREAT	N/A	Yes	Yes	WT	N/A	N/A	N/A
TCGA Provisional	TCGA-75-6212	Never Smoker	MUTANT	WILD TYPE	ELR746del	N/A	Yes	Yes	WT	N/A	N/A	N/A
TCGA Provisional	TCGA-38-4628	Never Smoker	MUTANT	WILD TYPE	ELREA746del	N/A	Yes	Yes	WT	N/A	N/A	N/A
TCGA Provisional	TCGA-38-6178	Never Smoker	MUTANT	WILD TYPE	ELREA746del	N/A	Yes	Yes	WT	N/A	N/A	N/A
TCGA Provisional	TCGA-49-4501	Never Smoker	MUTANT	WILD TYPE	ELREA746del	N/A	Yes	Yes	WT	N/A	N/A	N/A
Broad, Cell 2012	LUAD-NYU848	Never Smoker	MUTANT	WILD TYPE	ELREA746del	N/A	Yes	Yes	WT	N/A	N/A	N/A
Broad, Cell 2012	LUAD-NYU947	Never Smoker	MUTANT	WILD TYPE	ELREA746del	N/A	Yes	Yes	WT	N/A	N/A	N/A
Broad, Cell 2012	LUAD-RT-S01770	Never Smoker	MUTANT	WILD TYPE	ELREA746del	N/A	Yes	Yes	WT	N/A	N/A	N/A
Broad, Cell 2012	LUAD-S01362	Never Smoker	MUTANT	WILD TYPE	ELREA746del	N/A	Yes	Yes	WT	N/A	N/A	N/A
TSP, Nature 2008	16638	Never Smoker	MUTANT	WILD TYPE	ELREA746del	N/A	Yes	Yes	WT	N/A	N/A	N/A
TSP, Nature 2008	16841	Never Smoker	MUTANT	WILD TYPE	ELREA746del	N/A	Yes	Yes	WT	N/A	N/A	N/A
TSP, Nature 2008	17298	Never Smoker	MUTANT	WILD TYPE	ELREA746del	N/A	Yes	Yes	WT	N/A	N/A	N/A
TCGA Provisional	TCGA-17-Z032	Not Available	MUTANT	WILD TYPE	ELREA746del	N/A	Yes	Yes	WT	N/A	N/A	N/A
TSP, Nature 2008	16915	Not Available	MUTANT	WILD TYPE	ELREA746del	N/A	Yes	Yes	WT	N/A	N/A	N/A
TSP, Nature 2008	16979	Not Available	MUTANT	WILD TYPE	ELREA746del	N/A	Yes	Yes	WT	N/A	N/A	N/A
TCGA Provisional	TCGA-75-6207	Smoker	MUTANT	WILD TYPE	ELREA746del	N/A	Yes	Yes	WT	N/A	N/A	N/A
Broad, Cell 2012	LUAD-NYU802	Smoker	MUTANT	WILD TYPE	ELREA746del	N/A	Yes	Yes	WT	N/A	N/A	N/A
Broad, Cell 2012	LUAD-D00147	Smoker	MUTANT	WILD TYPE	ELREA746del	N/A	Yes	Yes	WT	N/A	N/A	N/A
Broad, Cell 2012	LUAD-QCHM7	Smoker	MUTANT	WILD TYPE	ELREA746del	N/A	Yes	Yes	WT	N/A	N/A	N/A
TSP, Nature 2008	16975	Smoker	MUTANT	WILD TYPE	ELREA746del	N/A	Yes	Yes	WT	N/A	N/A	N/A
TSP, Nature 2008	17184	Smoker	MUTANT	WILD TYPE	ELREA746del	N/A	Yes	Yes	WT	N/A	N/A	N/A
Seo et al.. Genome Research 2012	LC_C11	Never Smoker	MUTANT	WILD TYPE	K745_A750>T	N/A	Yes	Yes	WT	N/A	N/A	N/A
Seo et al.. Genome Research 2012	LC_C27	Never Smoker	MUTANT	WILD TYPE	K745_A750>T	N/A	Yes	Yes	WT	N/A	N/A	N/A
Seo et al.. Genome Research 2012	LC_C36	Never Smoker	MUTANT	WILD TYPE	K745_A750>T	N/A	Yes	Yes	WT	N/A	N/A	N/A
Seo et al.. Genome Research 2012	LC_S31	Smoker	MUTANT	WILD TYPE	K745_A750>T	N/A	Yes	Yes	WT	N/A	N/A	N/A
TCGA Provisional	TCGA-50-6591	Never Smoker	MUTANT	WILD TYPE	KANKEI754del,L833V	N/A	Yes	Yes	WT	N/A	N/A	N/A
Broad, Cell 2012	LUAD-RT-S01702	Never Smoker	MUTANT	WILD TYPE	L633F,769_770insASV	N/A	Yes	Yes	WT	N/A	N/A	N/A
TCGA Provisional	TCGA-05-4402	Never Smoker	MUTANT	WILD TYPE	TSPKANKE751del	N/A	Yes	Yes	WT	N/A	N/A	N/A
TCGA Provisional	TCGA-17-Z026	Not Available	MUTANT	WILD TYPE	G721V	high	Yes	Yes	WT	N/A	N/A	N/A
Broad, Cell 2012	LUAD-NYU184	Smoker	MUTANT	WILD TYPE	G857V	high	Yes	Yes	WT	N/A	N/A	N/A
TSP, Nature 2008	16925	Never Smoker	MUTANT	WILD TYPE	L861R	low	Yes	Yes	WT	N/A	N/A	N/A
TCGA Provisional	TCGA-17-Z035	Not Available	MUTANT	WILD TYPE	L861R	low	Yes	Yes	WT	N/A	N/A	N/A
Broad, Cell 2012	LUAD_E01319	Smoker	MUTANT	WILD TYPE	R831H	low	Yes	Yes	WT	N/A	N/A	N/A
TCGA Provisional	TCGA-05-4382	Smoker	MUTANT	WILD TYPE	E545Q	medium	No	Yes	WT	N/A	N/A	N/A
Broad, Cell 2012	LUAD-RT-S01813	Smoker	MUTANT	WILD TYPE	H1129Y	medium	No	Yes	WT	N/A	N/A	N/A
Broad, Cell 2012	LUAD-F00368	Not Available	MUTANT	WILD TYPE	R1100S	medium	No	Yes	WT	N/A	N/A	N/A
Broad, Cell 2012	LUAD-NYU608	Smoker	MUTANT	WILD TYPE	S645C	medium	No	Yes	WT	N/A	N/A	N/A
Broad, Cell 2012	LUAD-RT-S01810	Smoker	MUTANT	WILD TYPE	V536M	medium	No	Yes	WT	N/A	N/A	N/A
Broad, Cell 2012	LUAD-E01014	Smoker	MUTANT	WILD TYPE	G719A	medium	Yes	Yes	WT	N/A	N/A	N/A
Broad, Cell 2012	LUAD-NYU696	Smoker	MUTANT	WILD TYPE	G719A	medium	Yes	Yes	WT	N/A	N/A	N/A
TCGA Provisional	TCGA-67-3772	Never Smoker	MUTANT	WILD TYPE	L858R	medium	Yes	Yes	WT	N/A	N/A	N/A
Broad, Cell 2012	LUAD-F00134	Never Smoker	MUTANT	WILD TYPE	L858R	medium	Yes	Yes	WT	N/A	N/A	N/A
TSP, Nature 2008	16740	Never Smoker	MUTANT	WILD TYPE	L858R	medium	Yes	Yes	WT	N/A	N/A	N/A
Seo et al.. Genome Research 2012	LC_C16	Never Smoker	MUTANT	WILD TYPE	L858R	medium	Yes	Yes	WT	N/A	N/A	N/A
Seo et al.. Genome Research 2012	LC_C24	Never Smoker	MUTANT	WILD TYPE	L858R	medium	Yes	Yes	WT	N/A	N/A	N/A
Seo et al.. Genome Research 2012	LC_C29	Never Smoker	MUTANT	WILD TYPE	L858R	medium	Yes	Yes	WT	N/A	N/A	N/A
Seo et al.. Genome Research 2012	LC_C3	Never Smoker	MUTANT	WILD TYPE	L858R	medium	Yes	Yes	WT	N/A	N/A	N/A
Seo et al.. Genome Research 2012	LC_S24	Never Smoker	MUTANT	WILD TYPE	L858R	medium	Yes	Yes	WT	N/A	N/A	N/A
Seo et al.. Genome Research 2012	LC_S50	Never Smoker	MUTANT	WILD TYPE	L858R	medium	Yes	Yes	WT	N/A	N/A	N/A
TCGA Provisional	TCGA-17-Z047	Not Available	MUTANT	WILD TYPE	L858R	medium	Yes	Yes	WT	N/A	N/A	N/A
TCGA Provisional	TCGA-50-5944	Not Available	MUTANT	WILD TYPE	L858R	medium	Yes	Yes	WT	N/A	N/A	N/A
Broad, Cell 2012	LUAD-RT-S01856	Not Available	MUTANT	WILD TYPE	L858R	medium	Yes	Yes	WT	N/A	N/A	N/A
TSP, Nature 2008	16927	Not Available	MUTANT	WILD TYPE	L858R	medium	Yes	Yes	WT	N/A	N/A	N/A
Seo et al.. Genome Research 2012	LC_C12	Not Available	MUTANT	WILD TYPE	L858R	medium	Yes	Yes	WT	N/A	N/A	N/A
TCGA Provisional	TCGA-49-4490	Smoker	MUTANT	WILD TYPE	L858R	medium	Yes	Yes	WT	N/A	N/A	N/A
TCGA Provisional	TCGA-67-3770	Smoker	MUTANT	WILD TYPE	L858R	medium	Yes	Yes	WT	N/A	N/A	N/A
TCGA Provisional	TCGA-67-6217	Smoker	MUTANT	WILD TYPE	L858R	medium	Yes	Yes	WT	N/A	N/A	N/A
TCGA Provisional	TCGA-91-6835	Smoker	MUTANT	WILD TYPE	L858R	medium	Yes	Yes	WT	N/A	N/A	N/A
Broad, Cell 2012	LUAD_E01419	Smoker	MUTANT	WILD TYPE	L858R	medium	Yes	Yes	WT	N/A	N/A	N/A
Broad, Cell 2012	LUAD-NYU1210	Smoker	MUTANT	WILD TYPE	L858R	medium	Yes	Yes	WT	N/A	N/A	N/A
Broad, Cell 2012	LUAD-NYU252	Smoker	MUTANT	WILD TYPE	L858R	medium	Yes	Yes	WT	N/A	N/A	N/A
Broad, Cell 2012	LUAD-NYU704	Smoker	MUTANT	WILD TYPE	L858R	medium	Yes	Yes	WT	N/A	N/A	N/A
TSP, Nature 2008	16724	Smoker	MUTANT	WILD TYPE	L858R	medium	Yes	Yes	WT	N/A	N/A	N/A
TSP, Nature 2008	16760	Smoker	MUTANT	WILD TYPE	L858R	medium	Yes	Yes	WT	N/A	N/A	N/A
TSP, Nature 2008	16784	Smoker	MUTANT	WILD TYPE	L858R	medium	Yes	Yes	WT	N/A	N/A	N/A
TSP, Nature 2008	16786	Smoker	MUTANT	WILD TYPE	L858R	medium	Yes	Yes	WT	N/A	N/A	N/A
TSP, Nature 2008	16913	Smoker	MUTANT	WILD TYPE	L858R	medium	Yes	Yes	WT	N/A	N/A	N/A
TSP, Nature 2008	17228	Smoker	MUTANT	WILD TYPE	L858R	medium	Yes	Yes	WT	N/A	N/A	N/A
TSP, Nature 2008	17306	Smoker	MUTANT	WILD TYPE	L858R	medium	Yes	Yes	WT	N/A	N/A	N/A
Seo et al.. Genome Research 2012	LC_C35	Smoker	MUTANT	WILD TYPE	L858R	medium	Yes	Yes	WT	N/A	N/A	N/A
Seo et al.. Genome Research 2012	LC_S25	Smoker	MUTANT	WILD TYPE	L858R	medium	Yes	Yes	WT	N/A	N/A	N/A
Seo et al.. Genome Research 2012	LC_S5	Smoker	MUTANT	WILD TYPE	L858R	medium	Yes	Yes	WT	N/A	N/A	N/A
TSP, Nature 2008	17218	Not Available	MUTANT	WILD TYPE	R451F	medium	Yes	Yes	WT	N/A	N/A	N/A
Broad, Cell 2012	LUAD-NYU1093	Never Smoker	MUTANT	WILD TYPE	L861Q	neutral	Yes	Yes	WT	N/A	N/A	N/A
Broad, Cell 2012	LUAD-NYU1101	Smoker	MUTANT	WILD TYPE	L861Q	neutral	Yes	Yes	WT	N/A	N/A	N/A
Seo et al.. Genome Research 2012	LC_C26	Smoker	MUTANT	WILD TYPE	L858R,S811F	medium,low	Yes,No	Yes,No	WT	N/A	N/A	N/A
Broad, Cell 2012	LUAD-RT-S01711	Smoker	MUTANT	WILD TYPE	S768I,LREAT747del	medium,N/A	Yes,Yes	Yes,Yes	WT	N/A	N/A	N/A
TCGA Provisional	TCGA-49-4494	Smoker	MUTANT	WILD TYPE	T790M,L858R	low,medium	Yes,Yes	Yes,Yes	WT	N/A	N/A	N/A
Seo et al.. Genome Research 2012	LC_S35	Smoker	MUTANT	WILD TYPE	L858R,G598V	medium,high	Yes,Yes	Yes,Yes	WT	N/A	N/A	N/A
TSP, Nature 2008	17747	Not Available	MUTANT	WILD TYPE	S768I,G719S	medium,high	Yes,Yes	Yes,Yes	WT	N/A	N/A	N/A
Broad, Cell 2012	LUAD-NYU1142	Never Smoker	MUTANT	WILD TYPE	L858R,T790M	medium,low	Yes,Yes	Yes,Yes	WT	N/A	N/A	N/A
Seo et al.. Genome Research 2012	LC_C22	Smoker	MUTANT	WILD TYPE	L858R,V834L	medium,low	Yes,Yes	Yes,Yes	WT	N/A	N/A	N/A
Broad, Cell 2012	LUAD_E01166	Smoker	MUTANT	WILD TYPE	A237Y,G719A	medium,medium	Yes,Yes	Yes,Yes	WT	N/A	N/A	N/A
TCGA Provisional	TCGA-50-6595	Smoker	MUTANT	WILD TYPE	G719A,S768I	medium,medium	Yes,Yes	Yes,Yes	WT	N/A	N/A	N/A
Seo et al.. Genome Research 2012	LC_C30	Never Smoker	MUTANT	WILD TYPE	L62R, G719A	medium,medium	Yes,Yes	Yes,Yes	WT	N/A	N/A	N/A
TCGA Provisional	TCGA-38-4627	Smoker	MUTANT	WILD TYPE	L858R,L62R	medium,medium	Yes,Yes	Yes,Yes	WT	N/A	N/A	N/A
Broad, Cell 2012	LUAD-RT-S01771	Smoker	MUTANT	WILD TYPE	L858R,R776H	medium,medium	Yes,Yes	Yes,Yes	WT	N/A	N/A	N/A
TSP, Nature 2008	17739	Not Available	MUTANT	WILD TYPE	L858R,L833V	medium,neutral	Yes,Yes	Yes,Yes	WT	N/A	N/A	N/A
TSP, Nature 2008	17234	Smoker	MUTANT	WILD TYPE	L858R,L833V	medium,neutral	Yes,Yes	Yes,Yes	WT	N/A	N/A	N/A
TSP, Nature 2008	16965	Not Available	MUTANT	WILD TYPE	L861Q,V651M	neutral,medium	Yes,Yes	Yes,Yes	WT	N/A	N/A	N/A
TCGA Provisional	TCGA-44-6147	Smoker	MUTANT	WILD TYPE	V769L,S768I	neutral,medium	Yes,Yes	Yes,Yes	WT	N/A	N/A	N/A
TCGA Provisional	TCGA-05-5423	Smoker	MUTANT	WILD TYPE	L861Q,L833F	neutral,neutral	Yes,Yes	Yes,Yes	WT	N/A	N/A	N/A
