# Supplementary material for: Evidence that synthetic lethality underlies the mutual exclusivity of oncogenic KRAS and EGFR mutations in lung adenocarcinoma
Source: eLife. 2015 Jun 5;4:e06907. doi: 10.7554/eLife.06907 (PMC4478584; doi:10.7554/eLife.06907)
Supplement: Supplementary file 2. — Combinations of mutated genes significantly associated, positively or negatively, in various cancer types (Excel File B). DOI: http://dx.doi.org/10.7554/eLife.06907.010 [file elife06907s002.xlsx]

## Sheet: LUAD KRAS
Lung Adenocarcinoma - KRAS Non-Silent vs Non-Silent
Positively Associated								Negatively Associated
Gene	# of Tumors with Mutation in Gene	Expected # of Tumors with Co-Indcident KRAS Mutations	# of Tumors with Mutation in Gene and Mutation in KRAS	# of Tumors with Mutation in Gene and without Mutation in KRAS	# of Tumors without Mutation in Gene and with Mutation in KRAS	# of Tumors without Mutation in Gene or KRAS	P-Value	Gene	# of Tumors with Mutation in Gene	Expected # of Tumors with Co-Indcident KRAS Mutations	# of Tumors with Mutation in Gene and Mutation in KRAS	# of Tumors with Mutation in Gene and without Mutation in KRAS	# of Tumors without Mutation in Gene and with Mutation in KRAS	# of Tumors without Mutation in Gene or KRAS	P-Value
STK11	73	20.3558	35	38	110	337	6.38567e-05	EGFR	67	18.6827	1	66	144	309	1.59482e-09
ATM	46	12.8269	24	22	121	353	0.000225958	TP53	276	76.9615	52	224	93	151	7.64078e-07
OLFML1	8	2.23077	7	1	138	374	0.000720844	NF1	61	17.0096	7	54	138	321	0.00103945
CES1	8	2.23077	7	1	138	374	0.000720844	IFT172	20	5.57692	0	20	145	355	0.00125114
RBM10	34	9.48077	18	16	127	359	0.0012404	NID1	33	9.20192	2	31	143	344	0.00148046
MAP3K4	24	6.69231	14	10	131	365	0.00131923	SLC9A9	18	5.01923	0	18	145	357	0.00247588
DRP2	17	4.74038	11	6	134	369	0.00141446	EIF4G1	18	5.01923	0	18	145	357	0.00247588
MMP13	13	3.625	9	4	136	371	0.00203445	FER1L6	41	11.4327	4	37	141	338	0.00343601
SMARCD1	7	1.95192	6	1	139	374	0.00234331	UBR5	30	8.36538	2	28	143	347	0.00350069
DCST2	7	1.95192	6	1	139	374	0.00234331	DNAH8	59	16.4519	8	51	137	324	0.00500184
PREB	7	1.95192	6	1	139	374	0.00234331	TYR	28	7.80769	2	26	143	349	0.00613016
ZHX1	9	2.50962	7	2	138	373	0.00248274	GPRIN1	15	4.18269	0	15	145	360	0.00685076
MAP3K7	9	2.50962	7	2	138	373	0.00248274	SLC22A6	15	4.18269	0	15	145	360	0.00685076
ANKRD36	16	4.46154	10	6	135	369	0.00348405	PTPRR	15	4.18269	0	15	145	360	0.00685076
NOS3	12	3.34615	8	4	137	371	0.00531811	DGKG	15	4.18269	0	15	145	360	0.00685076
OR51I2	12	3.34615	8	4	137	371	0.00531811	BRAF	38	10.5962	4	34	141	341	0.00727965
CILP	12	3.34615	8	4	137	371	0.00531811	A2ML1	27	7.52885	2	25	143	350	0.0080765
GAA	12	3.34615	8	4	137	371	0.00531811	DLC1	27	7.52885	2	25	143	350	0.0080765
PTHLH	4	1.11538	4	0	141	375	0.00586629	BMPER	21	5.85577	1	20	144	355	0.00850775
CEP104	4	1.11538	4	0	141	375	0.00586629	RALGAPB	21	5.85577	1	20	144	355	0.00850775
NSUN5P2	4	1.11538	4	0	141	375	0.00586629	ASXL1	14	3.90385	0	14	145	361	0.00960245
OR14J1	10	2.78846	7	3	138	372	0.00634097	NYNRIN	14	3.90385	0	14	145	361	0.00960245
GLRA2	17	4.74038	10	7	135	368	0.00644061	C7orf60	14	3.90385	0	14	145	361	0.00960245
ERBB4	41	11.4327	19	22	126	353	0.00666033	IKZF1	14	3.90385	0	14	145	361	0.00960245
ADAMTS2	41	11.4327	19	22	126	353	0.00666033	OR2T1	26	7.25	2	24	143	351	0.0106077
GLA	8	2.23077	6	2	139	373	0.00721069	OR2B11	20	5.57692	1	19	144	356	0.011443
ZNF574	8	2.23077	6	2	139	373	0.00721069	FCRL1	20	5.57692	1	19	144	356	0.011443
GPR15	8	2.23077	6	2	139	373	0.00721069	C2orf16	20	5.57692	1	19	144	356	0.011443
COIL	6	1.67308	5	1	140	374	0.00743916	UMOD	20	5.57692	1	19	144	356	0.011443
CDK8	6	1.67308	5	1	140	374	0.00743916	POTEG	41	11.4327	5	36	140	339	0.0115613
RIPPLY2	6	1.67308	5	1	140	374	0.00743916	NLRP13	31	8.64423	3	28	142	347	0.0115855
LRRC7	74	20.6346	30	44	115	331	0.00771207	BTN2A3P	13	3.625	0	13	145	362	0.0134487
HLA-J	15	4.18269	9	6	136	369	0.00827759	IRGC	13	3.625	0	13	145	362	0.0134487
SH3PXD2B	13	3.625	8	5	137	370	0.010572	PDZD8	13	3.625	0	13	145	362	0.0134487
TTC29	13	3.625	8	5	137	370	0.010572	TTYH2	13	3.625	0	13	145	362	0.0134487
HKR1	13	3.625	8	5	137	370	0.010572	SRCAP	40	11.1538	5	35	140	340	0.0144989
ZIC3	13	3.625	8	5	137	370	0.010572	KCNH7	30	8.36538	3	27	142	348	0.0148844
FAM131B	13	3.625	8	5	137	370	0.010572	FOLH1	35	9.75962	4	31	141	344	0.0149702
LMBRD2	13	3.625	8	5	137	370	0.010572	CYP2C19	19	5.29808	1	18	144	357	0.0153485
NOS2	18	5.01923	10	8	135	367	0.0110371	NOVA1	19	5.29808	1	18	144	357	0.0153485
DYNC1I1	18	5.01923	10	8	135	367	0.0110371
SPTBN5	18	5.01923	10	8	135	367	0.0110371
AKR1B10	11	3.06731	7	4	138	371	0.0133766
EIF2C3	11	3.06731	7	4	138	371	0.0133766
KLK8	11	3.06731	7	4	138	371	0.0133766
MMP2	21	5.85577	11	10	134	365	0.0134667
XRN1	16	4.46154	9	7	136	368	0.0144407
SLC6A10P	16	4.46154	9	7	136	368	0.0144407

## Sheet: LUAD EGFR
Lung Adenocarcinoma - EGFR Non-Silent vs Non-Silent
Positively Associated								Negatively Associated
Gene	# of Tumors with Mutation in Gene	Expected # of Tumors with Co-Indcident EGFR Mutations	# of Tumors with Mutation in Gene and Mutation in EGFR	# of Tumors with Mutation in Gene and without Mutation in EGFR	# of Tumors without Mutation in Gene and with Mutation in EGFR	# of Tumors without Mutation in Gene or EGFR	P-Value	Gene	# of Tumors with Mutation in Gene	Expected # of Tumors with Co-Indcident EGFR Mutations	# of Tumors with Mutation in Gene and Mutation in EGFR	# of Tumors with Mutation in Gene and without Mutation in EGFR	# of Tumors without Mutation in Gene and with Mutation in EGFR	# of Tumors without Mutation in Gene or EGFR	P-Value
CXorf36	4	0.515385	4	0	63	453	0.00025452	KRAS	145	18.6827	1	144	66	309	1.59482e-09
MIR205HG	4	0.515385	4	0	63	453	0.00025452	LRP1B	181	23.3212	11	170	56	283	0.000335641
MRPL10	3	0.386538	3	0	64	453	0.00205604	RYR2	195	25.125	13	182	54	271	0.000558496
TTC31	3	0.386538	3	0	64	453	0.00205604	RP1L1	92	11.8538	3	89	64	364	0.000718309
TP53BP2	3	0.386538	3	0	64	453	0.00205604	PCDHGC5	248	31.9538	20	228	47	225	0.00118901
TRIM72	10	1.28846	5	5	62	448	0.00462427	KEAP1	88	11.3385	3	85	64	368	0.00120849
LCA5	7	0.901923	4	3	63	450	0.00655087	STK11	73	9.40577	2	71	65	382	0.00172748
EXTL1	7	0.901923	4	3	63	450	0.00655087	ZFHX4	155	19.9712	10	145	57	308	0.00226443
PARP3	7	0.901923	4	3	63	450	0.00655087	MUC16	229	29.5058	19	210	48	243	0.00369323
HLA-DQB2	7	0.901923	4	3	63	450	0.00655087	ZEB1	38	4.89615	0	38	67	415	0.00428553
C19orf55	4	0.515385	3	1	64	452	0.0074606	NAV3	109	14.0442	6	103	61	350	0.004847
HIST1H3F	4	0.515385	3	1	64	452	0.0074606	EPHA5	65	8.375	2	63	65	390	0.00485426
MAGEH1	4	0.515385	3	1	64	452	0.0074606	MLL2	51	6.57115	1	50	66	403	0.00565214
KIAA0513	4	0.515385	3	1	64	452	0.0074606	GRIN3A	35	4.50962	0	35	67	418	0.00670089
HR	8	1.03077	4	4	63	449	0.0118338	USH2A	171	22.0327	13	158	54	295	0.00710643
TPI1	8	1.03077	4	4	63	449	0.0118338	RYR1	84	10.8231	4	80	63	373	0.0076425
GCNT1	8	1.03077	4	4	63	449	0.0118338	NF1	61	7.85962	2	59	65	394	0.00799487
RASA2	8	1.03077	4	4	63	449	0.0118338	THSD7B	48	6.18462	1	47	66	406	0.0084294
								KCNJ3	32	4.12308	0	32	67	421	0.0104465
								ACAN	46	5.92692	1	45	66	408	0.0109663
								DST	58	7.47308	2	56	65	397	0.0115284
								OR2L2	31	3.99423	0	31	67	422	0.0121051
								PCDHAC2	216	27.8308	19	197	48	256	0.0123958
								COL3A1	57	7.34423	2	55	65	398	0.0130033
								BAI3	67	8.63269	3	64	64	389	0.0151878

## Sheet: LUAD PIK3CA
Lung Adenocarcinoma - PIK3CA Non-Silent vs Non-Silent
Positively Associated								Negatively Associated
Gene	# of Tumors with Mutation in Gene	Expected # of Tumors with Co-Indcident PIK3CA Mutations	# of Tumors with Mutation in Gene and Mutation in PIK3CA	# of Tumors with Mutation in Gene and without Mutation in PIK3CA	# of Tumors without Mutation in Gene and with Mutation in PIK3CA	# of Tumors without Mutation in Gene or PIK3CA	P-Value	Gene	# of Tumors with Mutation in Gene	Expected # of Tumors with Co-Indcident PIK3CA Mutations	# of Tumors with Mutation in Gene and Mutation in PIK3CA	# of Tumors with Mutation in Gene and without Mutation in PIK3CA	# of Tumors without Mutation in Gene and with Mutation in PIK3CA	# of Tumors without Mutation in Gene or PIK3CA	P-Value
EEF1A2	9	0.501923	5	4	24	487	4.10869e-05
ATE1	4	0.223077	3	1	26	490	0.000603645
ZP3	4	0.223077	3	1	26	490	0.000603645
BV13S6J2.1	22	1.22692	6	16	23	475	0.000707846
PLEK	10	0.557692	4	6	25	485	0.0013066
DDRGK1	5	0.278846	3	2	26	489	0.00145225
SLC7A7	5	0.278846	3	2	26	489	0.00145225
ADAM23	26	1.45	6	20	23	471	0.00186376
PAH	11	0.613462	4	7	25	484	0.00197371
LONP1	11	0.613462	4	7	25	484	0.00197371
PKD2L2	6	0.334615	3	3	26	488	0.0027952
FANK1	6	0.334615	3	3	26	488	0.0027952
IL22RA2	6	0.334615	3	3	26	488	0.0027952
C10orf90	12	0.669231	4	8	25	483	0.00284593
CNTD1	2	0.111538	2	0	27	491	0.00300874
KCNJ11	2	0.111538	2	0	27	491	0.00300874
STOX2	2	0.111538	2	0	27	491	0.00300874
C11orf54	2	0.111538	2	0	27	491	0.00300874
DUSP5	2	0.111538	2	0	27	491	0.00300874
TMEM200C	2	0.111538	2	0	27	491	0.00300874
L3MBTL2	2	0.111538	2	0	27	491	0.00300874
MAP4K5	2	0.111538	2	0	27	491	0.00300874
C5orf22	2	0.111538	2	0	27	491	0.00300874
HOXB7	2	0.111538	2	0	27	491	0.00300874
CDC16	2	0.111538	2	0	27	491	0.00300874
CD300LD	2	0.111538	2	0	27	491	0.00300874
KCTD5	2	0.111538	2	0	27	491	0.00300874
PDCD10	2	0.111538	2	0	27	491	0.00300874
COL22A1	61	3.40192	9	52	20	439	0.00351813
DIDO1	39	2.175	7	32	22	459	0.00353129
RPH3A	13	0.725	4	9	25	482	0.00395167
NFAT5	13	0.725	4	9	25	482	0.00395167
NBPF14	13	0.725	4	9	25	482	0.00395167
EMILIN1	7	0.390385	3	4	26	487	0.00470772
LRMP	7	0.390385	3	4	26	487	0.00470772
EFTUD2	7	0.390385	3	4	26	487	0.00470772
CAMK2D	7	0.390385	3	4	26	487	0.00470772
FAM154B	7	0.390385	3	4	26	487	0.00470772
ZNF468	7	0.390385	3	4	26	487	0.00470772
ZYG11B	7	0.390385	3	4	26	487	0.00470772
CSNK1E	7	0.390385	3	4	26	487	0.00470772
TRAM1L1	7	0.390385	3	4	26	487	0.00470772
AVPR1B	7	0.390385	3	4	26	487	0.00470772
KIAA0355	7	0.390385	3	4	26	487	0.00470772
EIF3B	7	0.390385	3	4	26	487	0.00470772
CHN1	7	0.390385	3	4	26	487	0.00470772
SKIV2L2	14	0.780769	4	10	25	481	0.00531824
XPNPEP2	14	0.780769	4	10	25	481	0.00531824
HELQ	14	0.780769	4	10	25	481	0.00531824
LCT	42	2.34231	7	35	22	456	0.00550079
KLHL1	43	2.39808	7	36	22	455	0.0063151
ZNF675	15	0.836538	4	11	25	480	0.00697158
INADL	15	0.836538	4	11	25	480	0.00697158
DDX11	15	0.836538	4	11	25	480	0.00697158
OR10J1	15	0.836538	4	11	25	480	0.00697158
CEP85L	8	0.446154	3	5	26	486	0.00724955
KIF3C	8	0.446154	3	5	26	486	0.00724955
SLC25A2	8	0.446154	3	5	26	486	0.00724955
STRA8	8	0.446154	3	5	26	486	0.00724955
NMNAT2	8	0.446154	3	5	26	486	0.00724955
DBT	8	0.446154	3	5	26	486	0.00724955
RDH11	3	0.167308	2	1	27	490	0.00871258
NOMO2	3	0.167308	2	1	27	490	0.00871258
AKT1S1	3	0.167308	2	1	27	490	0.00871258
CARKD	3	0.167308	2	1	27	490	0.00871258
PHOSPHO2	3	0.167308	2	1	27	490	0.00871258
HSD17B3	3	0.167308	2	1	27	490	0.00871258
RNF169	3	0.167308	2	1	27	490	0.00871258
UBXN2B	3	0.167308	2	1	27	490	0.00871258
SLC35D3	3	0.167308	2	1	27	490	0.00871258
TM2D1	3	0.167308	2	1	27	490	0.00871258
PRELID2	3	0.167308	2	1	27	490	0.00871258
SLC35F5	3	0.167308	2	1	27	490	0.00871258
ACOT11	3	0.167308	2	1	27	490	0.00871258
PDIA3	3	0.167308	2	1	27	490	0.00871258
SIRT7	3	0.167308	2	1	27	490	0.00871258
SLC16A2	3	0.167308	2	1	27	490	0.00871258
C11orf74	3	0.167308	2	1	27	490	0.00871258
ABHD4	3	0.167308	2	1	27	490	0.00871258
SAYSD1	3	0.167308	2	1	27	490	0.00871258
LRRC8E	3	0.167308	2	1	27	490	0.00871258
ANKRD13C	3	0.167308	2	1	27	490	0.00871258
NPR1	16	0.892308	4	12	25	479	0.00893595
CHM	16	0.892308	4	12	25	479	0.00893595
FOLH1	35	1.95192	6	29	23	462	0.00918137
ACCS	9	0.501923	3	6	26	485	0.0104665
MOV10L1	9	0.501923	3	6	26	485	0.0104665
GDPD2	9	0.501923	3	6	26	485	0.0104665
AADACL3	9	0.501923	3	6	26	485	0.0104665
TTLL2	9	0.501923	3	6	26	485	0.0104665
MYL2	9	0.501923	3	6	26	485	0.0104665
CDH15	9	0.501923	3	6	26	485	0.0104665
C3AR1	9	0.501923	3	6	26	485	0.0104665
UNC5A	17	0.948077	4	13	25	478	0.0112337
TNXB	27	1.50577	5	22	24	469	0.0128579
ALMS1	38	2.11923	6	32	23	459	0.0138511
BRAF	38	2.11923	6	32	23	459	0.0138511
LAMB3	18	1.00385	4	14	25	477	0.0138852
HELB	10	0.557692	3	7	26	484	0.0143922
CSDE1	10	0.557692	3	7	26	484	0.0143922
PPIG	10	0.557692	3	7	26	484	0.0143922
ZDHHC15	10	0.557692	3	7	26	484	0.0143922
ATAD5	10	0.557692	3	7	26	484	0.0143922
SLC35F3	10	0.557692	3	7	26	484	0.0143922
ANKLE2	10	0.557692	3	7	26	484	0.0143922
NEURL	10	0.557692	3	7	26	484	0.0143922
SPICE1	10	0.557692	3	7	26	484	0.0143922
U2SURP	10	0.557692	3	7	26	484	0.0143922
MID2	10	0.557692	3	7	26	484	0.0143922
PLEKHH2	10	0.557692	3	7	26	484	0.0143922
OR9Q2	10	0.557692	3	7	26	484	0.0143922
C14orf101	10	0.557692	3	7	26	484	0.0143922
LTBP2	28	1.56154	5	23	24	468	0.0150408
PCNXL2	28	1.56154	5	23	24	468	0.0150408

## Sheet: COAD KRAS
Colorectal Adenocarcinoma - KRAS Non-Silent vs Non-Silent
Positively Associated								Negatively Associated
Gene	# of Tumors with Mutation in Gene	Expected # of Tumors with Co-Indcident KRAS Mutations	# of Tumors with Mutation in Gene and Mutation in KRAS	# of Tumors with Mutation in Gene and without Mutation in KRAS	# of Tumors without Mutation in Gene and with Mutation in KRAS	# of Tumors without Mutation in Gene or KRAS	P-Value	Gene	# of Tumors with Mutation in Gene	Expected # of Tumors with Co-Indcident KRAS Mutations	# of Tumors with Mutation in Gene and Mutation in KRAS	# of Tumors with Mutation in Gene and without Mutation in KRAS	# of Tumors without Mutation in Gene and with Mutation in KRAS	# of Tumors without Mutation in Gene or KRAS	P-Value
PTPRU	12	5.19643	10	2	87	125	0.004617	BRAF	22	9.52679	1	21	96	106	3.36803e-05
VRTN	6	2.59821	6	0	91	127	0.0060256	EIF2C1	10	4.33036	0	10	97	117	0.00292545
ADAR	8	3.46429	7	1	90	126	0.0128198	ADAMTS17	9	3.89732	0	9	97	118	0.00533027
EPX	8	3.46429	7	1	90	126	0.0128198	ZEB2	16	6.92857	2	14	95	113	0.00759329
RUNDC3B	5	2.16518	5	0	92	127	0.0143435	GBF1	12	5.19643	1	11	96	116	0.0096116
STK10	5	2.16518	5	0	92	127	0.0143435	SECISBP2L	8	3.46429	0	8	97	119	0.00967512
NFXL1	5	2.16518	5	0	92	127	0.0143435	CNTNAP1	8	3.46429	0	8	97	119	0.00967512
								DDX58	8	3.46429	0	8	97	119	0.00967512

## Sheet: GBM EGFR
Glioblastoma Multiforme - EGFR Non-Silent vs Non-Silent
Positively Associated								Negatively Associated
Gene	# of Tumors with Mutation in Gene	Expected # of Tumors with Co-Indcident EGFR Mutations	# of Tumors with Mutation in Gene and Mutation in EGFR	# of Tumors with Mutation in Gene and without Mutation in EGFR	# of Tumors without Mutation in Gene and with Mutation in EGFR	# of Tumors without Mutation in Gene or EGFR	P-Value	Gene	# of Tumors with Mutation in Gene	Expected # of Tumors with Co-Indcident EGFR Mutations	# of Tumors with Mutation in Gene and Mutation in EGFR	# of Tumors with Mutation in Gene and without Mutation in EGFR	# of Tumors without Mutation in Gene and with Mutation in EGFR	# of Tumors without Mutation in Gene or EGFR	P-Value
MAP1S	4	1.05842	4	0	73	214	0.00462398	NF1	32	8.46735	3	29	74	185	0.0123179
ZNF91	4	1.05842	4	0	73	214	0.00462398
SIGLEC8	6	1.58763	5	1	72	213	0.00557636
STXBP5L	6	1.58763	5	1	72	213	0.00557636
SEMG1	9	2.38144	6	3	71	211	0.0121268

## Sheet: SKCM BRAF
Skin Cutaneous Melanoma - BRAF Non-Silent vs Non-Silent
Positively Associated								Negatively Associated
Gene	# of Tumors with Mutation in Gene	Expected # of Tumors with Co-Indcident BRAF Mutations	# of Tumors with Mutation in Gene and Mutation in BRAF	# of Tumors with Mutation in Gene and without Mutation in BRAF	# of Tumors without Mutation in Gene and with Mutation in BRAF	# of Tumors without Mutation in Gene or BRAF	P-Value	Gene	# of Tumors with Mutation in Gene	Expected # of Tumors with Co-Indcident BRAF Mutations	# of Tumors with Mutation in Gene and Mutation in BRAF	# of Tumors with Mutation in Gene and without Mutation in BRAF	# of Tumors without Mutation in Gene and with Mutation in BRAF	# of Tumors without Mutation in Gene or BRAF	P-Value
ADAM32	14	7.35968	13	1	120	119	0.00131113	NRAS	70	36.7984	4	66	129	54	1.90658e-22
WDR44	10	5.25692	10	0	123	120	0.0013645	EGFL6	11	5.78261	0	11	133	109	0.000212466
MUC16	176	92.5217	102	74	31	46	0.0069639	KCNT2	34	17.8735	9	25	124	95	0.000897607
UPF2	20	10.5138	16	4	117	116	0.00856384	CLTCL1	9	4.73123	0	9	133	111	0.00103174
SYNE3	7	3.67984	7	0	126	120	0.0102745	XDH	36	18.9249	10	26	123	94	0.00109776
PLCG1	7	3.67984	7	0	126	120	0.0102745	VPS13C	21	11.0395	4	17	129	103	0.00116523
PPM1H	7	3.67984	7	0	126	120	0.0102745	GLRB	23	12.0909	5	18	128	102	0.00168483
STK24	10	5.25692	9	1	124	119	0.0145693	EPHB1	23	12.0909	5	18	128	102	0.00168483
OR5M1	10	5.25692	9	1	124	119	0.0145693	ARSF	20	10.5138	4	16	129	104	0.00214072
CNOT1	16	8.41107	13	3	120	117	0.0150895	ZAN	46	24.1818	15	31	118	89	0.00221091
TEX13A	16	8.41107	13	3	120	117	0.0150895	OR13F1	8	4.20553	0	8	133	112	0.00225693
								FAM184A	17	8.93676	3	14	130	106	0.00261428
								OR4K13	14	7.35968	2	12	131	108	0.00299509
								A1CF	22	11.5652	5	17	128	103	0.00300185
								QRICH2	11	5.78261	1	10	132	110	0.00303826
								NFATC4	11	5.78261	1	10	132	110	0.00303826
								LRIG1	11	5.78261	1	10	132	110	0.00303826
								TLR4	24	12.6166	6	18	127	102	0.0039457
								COBL	24	12.6166	6	18	127	102	0.0039457
								NF1	38	19.9763	12	26	121	94	0.00405372
								KLHL6	7	3.67984	0	7	133	113	0.00491331
								CSHL1	7	3.67984	0	7	133	113	0.00491331
								HEATR4	7	3.67984	0	7	133	113	0.00491331
								KIT	7	3.67984	0	7	133	113	0.00491331
								SSH2	7	3.67984	0	7	133	113	0.00491331
								VIPR2	7	3.67984	0	7	133	113	0.00491331
								PAPPA	42	22.0791	14	28	119	92	0.00502814
								PPARGC1A	13	6.83399	2	11	131	109	0.00571802
								ST7	13	6.83399	2	11	131	109	0.00571802
								PDZRN3	13	6.83399	2	11	131	109	0.00571802
								PRRC2B	13	6.83399	2	11	131	109	0.00571802
								PSD3	13	6.83399	2	11	131	109	0.00571802
								ADAMTS12	28	14.7194	8	20	125	100	0.00597628
								NCR2	10	5.25692	1	9	132	111	0.00609317
								ENSG00000250641	10	5.25692	1	9	132	111	0.00609317
								SBF1	10	5.25692	1	9	132	111	0.00609317
								NISCH	10	5.25692	1	9	132	111	0.00609317
								UBN1	10	5.25692	1	9	132	111	0.00609317
								ZNF626	10	5.25692	1	9	132	111	0.00609317
								PHLPP2	10	5.25692	1	9	132	111	0.00609317
								DUOX2	23	12.0909	6	17	127	103	0.00673338
								NUP210	25	13.1423	7	18	126	102	0.0082446
								SELE	25	13.1423	7	18	126	102	0.0082446
								PROX1	15	7.88538	3	12	130	108	0.00879034
								LGSN	20	10.5138	5	15	128	105	0.00906764
								PTGFR	20	10.5138	5	15	128	105	0.00906764
								CTNND2	34	17.8735	11	23	122	97	0.00908384
								CMYA5	45	23.6561	16	29	117	91	0.00910049
								CRB1	47	24.7075	17	30	116	90	0.00969608
								MYO16	27	14.1937	8	19	125	101	0.00976358
								ABCB11	27	14.1937	8	19	125	101	0.00976358
								SPTBN4	27	14.1937	8	19	125	101	0.00976358
								STAB2	49	25.7589	18	31	115	89	0.0102591
								FAM13A	6	3.15415	0	6	133	114	0.0106455
								ISM2	6	3.15415	0	6	133	114	0.0106455
								MEOX1	6	3.15415	0	6	133	114	0.0106455
								E2F1	6	3.15415	0	6	133	114	0.0106455
								ZNF623	6	3.15415	0	6	133	114	0.0106455
								ST6GALNAC3	6	3.15415	0	6	133	114	0.0106455
								SGPP2	6	3.15415	0	6	133	114	0.0106455
								MTRR	6	3.15415	0	6	133	114	0.0106455
								IGHV3-38	6	3.15415	0	6	133	114	0.0106455
								SFI1	6	3.15415	0	6	133	114	0.0106455
								HDAC5	6	3.15415	0	6	133	114	0.0106455
								NPTX1	6	3.15415	0	6	133	114	0.0106455
								SIN3B	6	3.15415	0	6	133	114	0.0106455
								TSC22D2	6	3.15415	0	6	133	114	0.0106455
								SHB	6	3.15415	0	6	133	114	0.0106455
								WIPF1	6	3.15415	0	6	133	114	0.0106455
								2014-03-02	6	3.15415	0	6	133	114	0.0106455
								RCSD1	6	3.15415	0	6	133	114	0.0106455
								VCPIP1	6	3.15415	0	6	133	114	0.0106455
								PPP2R2C	6	3.15415	0	6	133	114	0.0106455
								PLEKHM3	12	6.3083	2	10	131	110	0.010745
								ERN1	12	6.3083	2	10	131	110	0.010745
								USP34	12	6.3083	2	10	131	110	0.010745
								SLC27A2	12	6.3083	2	10	131	110	0.010745
								KIAA1551	12	6.3083	2	10	131	110	0.010745
								KIAA1683	12	6.3083	2	10	131	110	0.010745
								IARS2	12	6.3083	2	10	131	110	0.010745
								SALL1	38	19.9763	13	25	120	95	0.0110447
								PCSK5	38	19.9763	13	25	120	95	0.0110447
								ADAMTS19	29	15.2451	9	20	124	100	0.0112654
								ZBBX	29	15.2451	9	20	124	100	0.0112654
								PSG6	22	11.5652	6	16	127	104	0.0112902
								KCNN3	17	8.93676	4	13	129	107	0.012046
								DICER1	17	8.93676	4	13	129	107	0.012046
								L3MBTL4	17	8.93676	4	13	129	107	0.012046
								MST1R	9	4.73123	1	8	132	112	0.0120584
								TXK	9	4.73123	1	8	132	112	0.0120584
								CHRNA3	9	4.73123	1	8	132	112	0.0120584
								MAPK8IP3	9	4.73123	1	8	132	112	0.0120584
								TSPEAR	9	4.73123	1	8	132	112	0.0120584
								ZCCHC14	9	4.73123	1	8	132	112	0.0120584
								LRRC52	9	4.73123	1	8	132	112	0.0120584
								ZNF606	9	4.73123	1	8	132	112	0.0120584
								RASGRP1	9	4.73123	1	8	132	112	0.0120584
								SPPL2C	9	4.73123	1	8	132	112	0.0120584
								ANGPTL5	9	4.73123	1	8	132	112	0.0120584
								UGT1A7	9	4.73123	1	8	132	112	0.0120584
								ASB5	9	4.73123	1	8	132	112	0.0120584
								DHX34	9	4.73123	1	8	132	112	0.0120584
								COL5A3	42	22.0791	15	27	118	93	0.0128471
								ADAMTSL1	24	12.6166	7	17	126	103	0.0135034
								NLRP7	24	12.6166	7	17	126	103	0.0135034
								LRTM1	24	12.6166	7	17	126	103	0.0135034
								PCNXL2	46	24.1818	17	29	116	91	0.0144607
								CSMD2	77	40.4783	32	45	101	75	0.0144706
								PKHD1L1	81	42.581	34	47	99	73	0.0145544
								SPTLC3	19	9.98814	5	14	128	106	0.0153411
								CLEC14A	19	9.98814	5	14	128	106	0.0153411
								LRRIQ4	19	9.98814	5	14	128	106	0.0153411
								MAGEC2	19	9.98814	5	14	128	106	0.0153411
