# Supplementary material for: Evidence that synthetic lethality underlies the mutual exclusivity of oncogenic KRAS and EGFR mutations in lung adenocarcinoma
Source: eLife. 2015 Jun 5;4:e06907. doi: 10.7554/eLife.06907 (PMC4478584; doi:10.7554/eLife.06907)
Supplement: Supplementary file 4. — Genes differentially expressed 24 hr after co-induction of mutant KRAS and EGFR (Excel File C). DOI: http://dx.doi.org/10.7554/eLife.06907.012 [file elife06907s004.xlsx]

## Sheet: Sheet1
Supplementary File 4: Genes differentially expressed 24 hours after mutant KRAS and EGFR co-induction
Transcript ID	Gene_Assignment	Gene Symbol	RefSeq	p-value(H358_L858R_Dox_24hr vs. H358_L858R_NoDox_24hr)	Fold-Change(H358_L858R_Dox_24hr vs. H358_L858R_NoDox_24hr)	p-value(PC9_KRAS_Dox_24hr vs. PC9_KRAS_NoDox_24hr)	Fold-Change(PC9_KRAS_Dox_24hr vs. PC9_KRAS_NoDox_24hr)	Average Fold Change (H358-EGFR and PC9-KRAS Dox vs No Dox)
17012946	NM_001270508 // TNFAIP3 // tumor necrosis factor, alpha-induced protein 3 // 6q23 // 71	TNFAIP3	NM_001270508	1.93326e-11	6.00992	2.05379e-09	3.53681	4.77337
16844585	NM_001165252 // KRTAP2-3 // keratin associated protein 2-3 // 17q21.2 // 730755 /// ENS	KRTAP2-3	NM_001165252	0.000130788	2.28738	1.50591e-08	6.2596	4.27349
17083357	NM_014143 // CD274 // CD274 molecule // 9p24 // 29126 /// ENST00000381577 // CD274 // C	CD274	NM_014143	7.62244e-10	4.70422	1.58458e-08	3.40644	4.05533
16695769	NM_053282 // SH2D1B // SH2 domain containing 1B // 1q23.3 // 117157 /// ENST00000367929	SH2D1B	NM_053282	5.21645e-10	5.67665	8.07667e-06	2.2103	3.94348
16754471	NM_014903 // NAV3 // neuron navigator 3 // 12q14.3 // 89795 /// ENST00000536525 // NAV3	NAV3	NM_014903	1.40838e-09	3.75834	1.07457e-08	3.10172	3.43003
16754373	NM_006851 // GLIPR1 // GLI pathogenesis-related 1 // 12q21.2 // 11010 /// ENST000002666	GLIPR1	NM_006851	3.83452e-08	3.0641	4.88249e-08	2.99939	3.03174
16883690	NM_016232 // IL1RL1 // interleukin 1 receptor-like 1 // 2q12 // 9173 /// ENST0000023395	IL1RL1	NM_016232	0.000156602	1.80035	5.74751e-09	4.18679	2.99357
16765558	ENST00000293379 // ITGA5 // integrin, alpha 5 (fibronectin receptor, alpha polypeptide)	ITGA5	ENST00000293379	4.76679e-11	3.82786	1.09761e-07	2.09526	2.96156
16697370	NM_000963 // PTGS2 // prostaglandin-endoperoxide synthase 2 (prostaglandin G/H synthase	PTGS2	NM_000963	2.58501e-06	2.44159	6.55068e-08	3.36412	2.90286
17000724	ENST00000230990 // HBEGF // heparin-binding EGF-like growth factor // 5q23 // 1839 ///	HBEGF	ENST00000230990	1.15972e-07	2.7352	3.05849e-08	3.06356	2.89938
16875754	NM_000641 // IL11 // interleukin 11 // 19q13.3-q13.4 // 3589 /// ENST00000264563 // IL1	IL11	NM_000641	0.000251836	1.67156	8.59739e-09	3.58416	2.62786
16989736	NM_001964 // EGR1 // early growth response 1 // 5q31.1 // 1958 /// ENST00000239938 // E	EGR1	NM_001964	7.51286e-08	2.87947	9.31074e-07	2.36134	2.6204
16977251	NM_058172 // ANTXR2 // anthrax toxin receptor 2 // 4q21.21 // 118429 /// ENST0000040372	ANTXR2	NM_058172	1.61927e-06	1.82899	4.17861e-10	3.20831	2.51865
17048842	NR_002147 // MYH16 // myosin, heavy chain 16 pseudogene // 7q22.1 // 84176	MYH16	NR_002147	1.01936e-07	2.80501	1.91409e-05	1.9265	2.36576
16943230	OTTHUMT00000353102 // OTTHUMG00000159060 // NULL // --- // --- /// OTTHUMT00000353102 /	OTTHUMG00000159060	OTTHUMT00000353102	6.65098e-05	1.98034	1.03606e-06	2.72174	2.35104
17023810	NM_001143676 // SGK1 // serum/glucocorticoid regulated kinase 1 // 6q23 // 6446 /// ENS	SGK1	NM_001143676	4.02945e-06	2.04118	1.42964e-07	2.57753	2.30936
16811638	NM_003612 // SEMA7A // semaphorin 7A, GPI membrane anchor (John Milton Hagen blood grou	SEMA7A	NM_003612	1.44348e-12	3.11696	4.11269e-06	1.42823	2.27259
16766578	NM_001195056 // DDIT3 // DNA-damage-inducible transcript 3 // 12q13.1-q13.2 // 1649 ///	DDIT3	NM_001195056	3.95295e-07	2.14897	1.27491e-07	2.31527	2.23212
17002846	NM_004417 // DUSP1 // dual specificity phosphatase 1 // 5q34 // 1843 /// ENST0000023922	DUSP1	NM_004417	1.15303e-06	2.08736	2.24444e-07	2.3256	2.20648
16984689	NR_073105 // ITGA2 // integrin, alpha 2 (CD49B, alpha 2 subunit of VLA-2 receptor) // 5	ITGA2	NR_073105	1.50451e-13	3.02779	2.19375e-06	1.36519	2.19649
16662322	ENST00000373362 // GJB3 // gap junction protein, beta 3, 31kDa // 1p34 // 2707 /// NM_0	GJB3	ENST00000373362	6.57533e-08	2.37527	1.74074e-06	1.93292	2.15409
17102309	ENST00000378993 // IL1RAPL1 // interleukin 1 receptor accessory protein-like 1 // Xp22.	IL1RAPL1	ENST00000378993	3.85623e-06	1.98643	4.23984e-07	2.29226	2.13935
16873060	NM_002659 // PLAUR // plasminogen activator, urokinase receptor // 19q13 // 5329 /// NM	PLAUR	NM_002659	6.41812e-12	2.49173	6.21458e-09	1.72352	2.10763
16803018	NM_006465 // ARID3B // AT rich interactive domain 3B (BRIGHT-like) // 15q24 // 10620 //	ARID3B	NM_006465	1.65147e-07	2.34128	1.88039e-05	1.75661	2.04894
17007810	NM_001171818 // PPARD // peroxisome proliferator-activated receptor delta // 6p21.2 //	PPARD	NM_001171818	6.91146e-11	2.67467	3.42413e-05	1.40092	2.0378
16823215	NM_022119 // PRSS22 // protease, serine, 22 // 16p13.3 // 64063 /// ENST00000161006 //	PRSS22	NM_022119	1.85326e-09	2.42216	3.06585e-06	1.62466	2.02341
17059776	NM_152703 // SAMD9L // sterile alpha motif domain containing 9-like // 7q21.2 // 219285	SAMD9L	NM_152703	3.07122e-10	2.62746	6.96984e-05	1.41196	2.01971
17072351	NM_032899 // FAM83A // family with sequence similarity 83, member A // 8q24.13 // 84985	FAM83A	NM_032899	3.97609e-08	2.3213	1.21268e-05	1.67885	2.00007
16661544	NM_031459 // SESN2 // sestrin 2 // 1p35.3 // 83667 /// ENST00000253063 // SESN2 // sest	SESN2	NM_031459	1.9075e-08	2.20867	1.00863e-06	1.77424	1.99146
16996684	NM_197941 // ADAMTS6 // ADAM metallopeptidase with thrombospondin type 1 motif, 6 // 5q	ADAMTS6	NM_197941	1.46559e-05	1.77472	4.21295e-07	2.18862	1.98167
16980716	ENST00000304385 // TMEM154 // transmembrane protein 154 // 4q31.3 // 201799 /// NM_1526	TMEM154	ENST00000304385	1.37913e-08	2.35008	1.54486e-05	1.60443	1.97725
16745997	NM_001143820 // ETS1 // v-ets erythroblastosis virus E26 oncogene homolog 1 (avian) //	ETS1	NM_001143820	6.41767e-06	1.90834	3.52896e-06	1.97728	1.94281
16762661	NM_002820 // PTHLH // parathyroid hormone-like hormone // 12p12.1-p11.2 // 5744 /// ENS	PTHLH	NM_002820	0.000222235	1.7669	2.05402e-05	2.06322	1.91506
16696824	NM_007314 // ABL2 // v-abl Abelson murine leukemia viral oncogene homolog 2 // 1q25.2 /	ABL2	NM_007314	4.0832e-09	1.84843	1.04957e-09	1.97721	1.91282
16698883	NM_001017402 // LAMB3 // laminin, beta 3 // 1q32 // 3914 /// ENST00000391911 // LAMB3 /	LAMB3	NM_001017402	3.35713e-09	2.20114	3.83389e-06	1.55913	1.88014
16740630	NM_005438 // FOSL1 // FOS-like antigen 1 // 11q13 // 8061 /// ENST00000312562 // FOSL1	FOSL1	NM_005438	9.87254e-06	1.92557	2.70435e-05	1.81498	1.87027
17001063	NM_030964 // SPRY4 // sprouty homolog 4 (Drosophila) // 5q31.3 // 81848 /// ENST0000034	SPRY4	NM_030964	1.62107e-06	1.94957	1.19761e-05	1.74801	1.84879
16664005	ENST00000372201 // PLK3 // polo-like kinase 3 // 1p34.1 // 1263 /// NM_004073 // PLK3 /	PLK3	ENST00000372201	1.71674e-06	1.76133	4.28088e-07	1.89053	1.82593
16687123	NM_002867 // RAB3B // RAB3B, member RAS oncogene family // 1p32-p31 // 5865 /// ENST000	RAB3B	NM_002867	1.65191e-06	1.86895	1.69936e-05	1.66058	1.76476
16969229	NM_014395 // DAPP1 // dual adaptor of phosphotyrosine and 3-phosphoinositides // 4q25-q	DAPP1	NM_014395	0.000180822	1.57195	2.97413e-06	1.95667	1.76431
16952414	NM_033027 // CSRNP1 // cysteine-serine-rich nuclear protein 1 // 3p22 // 64651 /// ENST	CSRNP1	NM_033027	1.60256e-06	1.90294	3.48966e-05	1.62552	1.76423
16674845	NM_005562 // LAMC2 // laminin, gamma 2 // 1q25-q31 // 3918 /// ENST00000264144 // LAMC2	LAMC2	NM_005562	5.47304e-08	1.93348	3.99539e-06	1.58436	1.75892
16943919	ENST00000264848 // C3orf52 // chromosome 3 open reading frame 52 // 3q13.2 // 79669 ///	C3orf52	ENST00000264848	1.72822e-11	2.02574	4.01588e-08	1.47866	1.7522
16698756	ENST00000359470 // C1orf116 // chromosome 1 open reading frame 116 // 1q32.1 // 79098 /	C1orf116	ENST00000359470	6.51939e-07	1.56794	1.01214e-08	1.87666	1.7223
16957125	NM_014981 // MYH15 // myosin, heavy chain 15 // 3q13.13 // 22989 /// ENST00000273353 //	MYH15	NM_014981	9.14009e-06	1.73311	2.13545e-05	1.6621	1.6976
17097643	NM_005118 // TNFSF15 // tumor necrosis factor (ligand) superfamily, member 15 // 9q32 /	TNFSF15	NM_005118	1.47059e-06	1.69588	1.70983e-06	1.68435	1.69012
17061881	NM_014705 // DOCK4 // dedicator of cytokinesis 4 // 7q31.1 // 9732 /// ENST00000437633	DOCK4	NM_014705	0.000332568	1.25392	3.19986e-10	2.10796	1.68094
16872443	ENST00000357949 // SERTAD1 // SERTA domain containing 1 // 19q13.1-q13.2 // 29950 /// N	SERTAD1	ENST00000357949	0.000109125	1.61697	4.1061e-05	1.69948	1.65823
16855600	NM_133459 // CCBE1 // collagen and calcium binding EGF domains 1 // 18q21.32 // 147372	CCBE1	NM_133459	5.84352e-06	1.50123	2.13739e-07	1.71487	1.60805
16852573	NM_001144967 // NEDD4L // neural precursor cell expressed, developmentally down-regulat	NEDD4L	NM_001144967	3.04169e-06	1.58748	2.11071e-06	1.6115	1.59949
16997146	NM_004472 // FOXD1 // forkhead box D1 // 5q12-q13 // 2297 /// ENST00000499003 // FOXD1	FOXD1	NM_004472	6.68154e-05	1.48532	3.19746e-06	1.69227	1.58879
16780859	NM_004093 // EFNB2 // ephrin-B2 // 13q33 // 1948 /// ENST00000245323 // EFNB2 // ephrin	EFNB2	NM_004093	5.94869e-07	1.50174	3.2454e-08	1.67417	1.58796
16682098	NM_004431 // EPHA2 // EPH receptor A2 // 1p36 // 1969 /// ENST00000358432 // EPHA2 // E	EPHA2	NM_004431	7.09067e-05	1.35424	3.71302e-08	1.7999	1.57707
16735952	NM_032320 // BTBD10 // BTB (POZ) domain containing 10 // 11p15.2 // 84280 /// ENST00000	BTBD10	NM_032320	6.33206e-05	1.51885	1.24114e-05	1.6307	1.57478
17067231	NM_173174 // PTK2B // protein tyrosine kinase 2 beta // 8p21.1 // 2185 /// ENST00000397	PTK2B	NM_173174	1.45477e-10	1.74928	1.62139e-07	1.38326	1.56627
16784333	NM_015589 // SAMD4A // sterile alpha motif domain containing 4A // 14q22.2 // 23034 ///	SAMD4A	NM_015589	2.67349e-05	1.56726	4.29595e-05	1.53586	1.55156
16793999	ENST00000216446 // PLEK2 // pleckstrin 2 // 14q23.3 // 26499 /// NM_016445 // PLEK2 //	PLEK2	ENST00000216446	3.26373e-06	1.60748	2.10584e-05	1.49231	1.5499
16984244	NM_003999 // OSMR // oncostatin M receptor // 5p13.1 // 9180 /// ENST00000274276 // OSM	OSMR	NM_003999	5.0893e-10	1.70643	9.86417e-07	1.34061	1.52352
16998309	NM_012081 // ELL2 // elongation factor, RNA polymerase II, 2 // 5q15 // 22936 /// ENST0	ELL2	NM_012081	4.06225e-08	1.55046	1.253e-07	1.49273	1.5216
16662945	NM_001136493 // MFSD2A // major facilitator superfamily domain containing 2A // 1p34.2	MFSD2A	NM_001136493	4.83996e-06	1.58885	6.66635e-05	1.43526	1.51206
16917061	NM_017671 // FERMT1 // fermitin family member 1 // 20p12.3 // 55612 /// ENST00000217289	FERMT1	NM_017671	5.02598e-07	1.5458	2.2385e-06	1.46729	1.50655
16942103	NM_001164317 // FLNB // filamin B, beta // 3p14.3 // 2317 /// NM_001457 // FLNB // fila	FLNB	NM_001164317	5.09914e-09	1.67477	1.41084e-05	1.30515	1.48996
16804942	ENST00000268171 // FURIN // furin (paired basic amino acid cleaving enzyme) // 15q26.1	FURIN	ENST00000268171	3.26047e-09	1.69553	2.61599e-05	1.2821	1.48881
16881838	NM_000189 // HK2 // hexokinase 2 // 2p13 // 3099 /// ENST00000290573 // HK2 // hexokina	HK2	NM_000189	1.93688e-08	1.53443	1.58604e-07	1.43597	1.4852
17043882	NM_178423 // HDAC9 // histone deacetylase 9 // 7p21.1 // 9734 /// ENST00000406451 // HD	HDAC9	NM_178423	7.17286e-05	1.38375	1.65413e-06	1.58524	1.48449
16673544	NM_003666 // BLZF1 // basic leucine zipper nuclear factor 1 // 1q24 // 8548 /// ENST000	BLZF1	NM_003666	3.51362e-05	1.4754	3.37625e-05	1.47763	1.47652
17093661	ENST00000322813 // FAM214B // family with sequence similarity 214, member B // 9p13.3 /	FAM214B	ENST00000322813	4.874e-07	1.53899	7.85609e-06	1.40287	1.47093
16768675	NM_018351 // FGD6 // FYVE, RhoGEF and PH domain containing 6 // 12q22 // 55785 /// ENST	FGD6	NM_018351	1.61971e-05	1.42746	3.17972e-06	1.51076	1.46911
17045542	NM_004760 // STK17A // serine/threonine kinase 17a // 7p13 // 9263 /// ENST00000319357	STK17A	NM_004760	1.09608e-05	1.40026	7.64857e-07	1.53052	1.46539
17046683	NM_014504 // RABGEF1 // RAB guanine nucleotide exchange factor (GEF) 1 // 7q11.21 // 27	RABGEF1	NM_014504	6.93707e-08	1.53581	2.88892e-06	1.369	1.4524
16958786	NM_007283 // MGLL // monoglyceride lipase // 3q21.3 // 11343 /// NM_001003794 // MGLL /	MGLL	NM_007283	7.43191e-09	1.51093	1.29717e-07	1.38955	1.45024
16947287	NM_001184717 // TIPARP // TCDD-inducible poly(ADP-ribose) polymerase // 3q25.31 // 2597	TIPARP	NM_001184717	2.32776e-08	1.48451	2.12637e-07	1.39199	1.43825
16898788	NM_003236 // TGFA // transforming growth factor, alpha // 2p13 // 7039 /// NM_001099691	TGFA	NM_003236	1.52319e-06	1.51205	4.8157e-05	1.35145	1.43175
16804478	ENST00000332810 // AEN // apoptosis enhancing nuclease // 15q26.1 // 64782 /// NM_02276	AEN	ENST00000332810	1.52032e-06	1.51482	5.38842e-05	1.34865	1.43173
16855684	ENST00000406396 // KDSR // 3-ketodihydrosphingosine reductase // 18q21.3 // 2531 /// NM	KDSR	ENST00000406396	8.15547e-08	1.56821	5.98299e-05	1.28593	1.42707
16851443	NM_003831 // RIOK3 // RIO kinase 3 // 18q11.2 // 8780 /// ENST00000339486 // RIOK3 // R	RIOK3	NM_003831	1.38633e-09	1.54478	8.09951e-07	1.29918	1.42198
16832438	NM_021137 // TNFAIP1 // tumor necrosis factor, alpha-induced protein 1 (endothelial) //	TNFAIP1	NM_021137	1.93032e-10	1.63623	3.32704e-05	1.20046	1.41834
16856803	NM_015675 // GADD45B // growth arrest and DNA-damage-inducible, beta // 19p13.3 // 4616	GADD45B	NM_015675	5.15194e-05	1.37897	1.12023e-05	1.45036	1.41467
17013126	ENST00000230173 // GPR126 // G protein-coupled receptor 126 // 6q24.1 // 57211 /// ENST	GPR126	ENST00000230173	0.000213022	1.34059	1.59491e-05	1.46256	1.40158
16706499	NM_005729 // PPIF // peptidylprolyl isomerase F // 10q22-q23 // 10105 /// ENST000002251	PPIF	NM_005729	1.93867e-06	1.43826	1.11141e-05	1.36467	1.40146
16673056	NM_003115 // UAP1 // UDP-N-acteylglucosamine pyrophosphorylase 1 // 1q23.3 // 6675 ///	UAP1	NM_003115	1.15521e-05	1.42124	3.12594e-05	1.37708	1.39916
16946309	NM_001104647 // SLC25A36 // solute carrier family 25 (pyrimidine nucleotide carrier ),	SLC25A36	NM_001104647	0.000195036	1.31551	6.12236e-06	1.46922	1.39236
16961637	NM_001146276 // NCEH1 // neutral cholesterol ester hydrolase 1 // 3q26.31 // 57552 ///	NCEH1	NM_001146276	1.19653e-06	1.46089	4.98105e-05	1.30935	1.38512
16860920	NR_028406 // FXYD5 // FXYD domain containing ion transport regulator 5 // 19q13.12 // 5	FXYD5	NR_028406	6.76106e-07	1.45836	5.25939e-05	1.28947	1.37391
16676764	NM_000574 // CD55 // CD55 molecule, decay accelerating factor for complement (Cromer bl	CD55	NM_000574	0.000238235	1.25063	6.08223e-07	1.47981	1.36522
16832268	NM_145109 // MAP2K3 // mitogen-activated protein kinase kinase 3 // 17q11.2 // 5606 ///	MAP2K3	NM_145109	2.31564e-05	1.35657	3.54458e-05	1.34005	1.34831
17002777	ENST00000176763 // STK10 // serine/threonine kinase 10 // 5q35.1 // 6793 /// NM_005990	STK10	ENST00000176763	5.08672e-06	1.3623	2.76549e-05	1.30248	1.33239
16929920	NM_005318 // H1F0 // H1 histone family, member 0 // 22q13.1 // 3005 /// ENST00000340857	H1F0	NM_005318	3.54283e-05	1.24401	2.372e-05	1.25477	1.24939
17044800	NM_002047 // GARS // glycyl-tRNA synthetase // 7p15 // 2617 /// ENST00000389266 // GARS	GARS	NM_002047	2.01523e-05	1.26199	6.13714e-05	1.23217	1.24708
17046886	NR_002206 // GTF2IP1 // general transcription factor IIi, pseudogene 1 // 7q11.23 // 29	GTF2IP1	NR_002206	7.57262e-05	-1.2023	4.46739e-05	-1.21436	-1.20833
17058731	NR_002206 // GTF2IP1 // general transcription factor IIi, pseudogene 1 // 7q11.23 // 29	GTF2IP1	NR_002206	8.57349e-05	-1.20643	7.16148e-05	-1.21062	-1.20852
17019805	ENST00000296861 // TNFRSF21 // tumor necrosis factor receptor superfamily, member 21 //	TNFRSF21	ENST00000296861	3.22442e-05	-1.23392	6.6103e-05	-1.2163	-1.22511
16818630	NM_001031835 // PHKB // phosphorylase kinase, beta // 16q12-q13 // 5257 /// ENST0000056	PHKB	NM_001031835	2.14302e-05	-1.21188	1.18764e-06	-1.28298	-1.24743
17075082	NM_177924 // ASAH1 // N-acylsphingosine amidohydrolase (acid ceramidase) 1 // 8p22 // 4	ASAH1	NM_177924	0.000105367	-1.24264	2.05469e-05	-1.29092	-1.26678
16836375	ENST00000284073 // MSI2 // musashi RNA-binding protein 2 // 17q22 // 124540 /// NM_1389	MSI2	ENST00000284073	0.000285045	-1.20209	1.06679e-06	-1.36848	-1.28529
16803743	NM_021214 // ABHD17C // abhydrolase domain containing 17C // 15q25.1 // 58489 /// ENST0	ABHD17C	NM_021214	2.55783e-05	-1.27024	9.40588e-06	-1.30044	-1.28534
17075731	NR_038335 // CLU // clusterin // 8p21-p12 // 1191 /// NM_001831 // CLU // clusterin //	CLU	NR_038335	0.00016826	-1.27878	6.03283e-05	-1.31442	-1.2966
16962493	NM_002916 // RFC4 // replication factor C (activator 1) 4, 37kDa // 3q27 // 5984 /// EN	RFC4	NM_002916	3.05917e-06	-1.33439	1.82711e-05	-1.27785	-1.30612
16994002	NM_024830 // LPCAT1 // lysophosphatidylcholine acyltransferase 1 // 5p15.33 // 79888 //	LPCAT1	NM_024830	1.44151e-05	-1.36986	3.82602e-05	-1.33204	-1.35095
16817337	ENST00000317058 // CCDC101 // coiled-coil domain containing 101 // 16p11.2 // 112869 //	CCDC101	ENST00000317058	2.2561e-06	-1.36157	3.52245e-06	-1.34554	-1.35356
16959871	NM_001178138 // TFDP2 // transcription factor Dp-2 (E2F dimerization partner 2) // 3q23	TFDP2	NM_001178138	7.21817e-06	-1.40133	4.21909e-05	-1.33069	-1.36601
16908834	NM_015311 // OBSL1 // obscurin-like 1 // 2q35 // 23363 /// ENST00000404537 // OBSL1 //	OBSL1	NM_015311	0.000335989	-1.25502	9.91582e-07	-1.48703	-1.37102
17010584	NM_183050 // BCKDHB // branched chain keto acid dehydrogenase E1, beta polypeptide // 6	BCKDHB	NM_183050	9.2338e-07	-1.43541	1.49458e-05	-1.32612	-1.38077
16877007	NM_001177716 // KLF11 // Kruppel-like factor 11 // 2p25 // 8462 /// ENST00000540845 //	KLF11	NM_001177716	9.66311e-05	-1.31237	1.9054e-06	-1.48094	-1.39665
16937505	NM_001018115 // FANCD2 // Fanconi anemia, complementation group D2 // 3p26 // 2177 ///	FANCD2	NM_001018115	7.32172e-09	-1.55617	3.18099e-05	-1.24287	-1.39952
16870144	NM_005234 // NR2F6 // nuclear receptor subfamily 2, group F, member 6 // 19p13.1 // 206	NR2F6	NM_005234	9.04831e-07	-1.46198	1.72998e-05	-1.33916	-1.40057
17019778	ENST00000371253 // GPR110 // G protein-coupled receptor 110 // 6p12.3 // 266977 /// NM_	GPR110	ENST00000371253	2.92455e-06	-1.50627	3.25362e-05	-1.38843	-1.44735
17047258	NM_001145063 // GATSL1 // GATS protein-like 1 // 7q11.23 // 389523 /// ENST00000361825	GATSL1	NM_001145063	0.000121184	-1.35707	9.8146e-07	-1.61289	-1.48498
16678114	NM_000120 // EPHX1 // epoxide hydrolase 1, microsomal (xenobiotic) // 1q42.1 // 2052 //	EPHX1	NM_000120	3.64131e-09	-1.67707	1.42393e-05	-1.29687	-1.48697
16748196	NR_046444 // LOC374443 // C-type lectin domain family 2, member D pseudogene // 12p13.3	LOC374443	NR_046444	0.000123973	-1.35706	5.17238e-07	-1.65826	-1.50766
16761830	ENST00000266397 // ERP27 // endoplasmic reticulum protein 27 // 12p12.3 // 121506 /// N	ERP27	ENST00000266397	4.96006e-05	-1.48273	1.53981e-05	-1.55397	-1.51835
16851586	NM_012189 // CABYR // calcium binding tyrosine-(Y)-phosphorylation regulated // 18q11.2	CABYR	NM_012189	0.000220997	-1.47242	4.50259e-05	-1.57784	-1.52513
16945375	NM_052985 // IFT122 // intraflagellar transport 122 homolog (Chlamydomonas) // 3q21 //	IFT122	NM_052985	1.64911e-08	-1.69441	4.78457e-06	-1.39008	-1.54224
16686557	NM_003629 // PIK3R3 // phosphoinositide-3-kinase, regulatory subunit 3 (gamma) // 1p34.	PIK3R3	NM_003629	4.48972e-08	-1.7399	4.57389e-05	-1.35402	-1.54696
16989897	ENST00000302517 // CXXC5 // CXXC finger protein 5 // 5q31.2 // 51523 /// NM_016463 // C	CXXC5	ENST00000302517	5.00184e-05	-1.43657	1.18054e-06	-1.66568	-1.55112
16723546	NM_001752 // CAT // catalase // 11p13 // 847 /// ENST00000241052 // CAT // catalase //	CAT	NM_001752	1.12199e-05	-1.53073	3.29322e-06	-1.60887	-1.5698
16895871	ENST00000260570 // IFT172 // intraflagellar transport 172 homolog (Chlamydomonas) // 2p	IFT172	ENST00000260570	3.92437e-05	-1.5559	2.06212e-05	-1.6005	-1.5782
16835909	NM_017957 // EPN3 // epsin 3 // 17q21.33 // 55040 /// ENST00000268933 // EPN3 // epsin	EPN3	NM_017957	2.39994e-08	-1.74004	4.89819e-06	-1.42701	-1.58352
16675533	ENST00000367393 // C1orf53 // chromosome 1 open reading frame 53 // 1q31.3 // 388722 //	C1orf53	ENST00000367393	2.99691e-07	-1.7594	6.84871e-05	-1.41397	-1.58669
17097446	NM_001012361 // WDR31 // WD repeat domain 31 // 9q32 // 114987 /// NM_145241 // WDR31 /	WDR31	NM_001012361	1.25559e-05	-1.6009	1.04458e-05	-1.61387	-1.60738
16814988	NM_014353 // RAB26 // RAB26, member RAS oncogene family // 16p13.3 // 25837 /// ENST000	RAB26	NM_014353	1.75308e-06	-1.62887	1.25372e-06	-1.65232	-1.6406
16662234	NM_152493 // ZNF362 // zinc finger protein 362 // 1p35.1 // 149076 /// ENST00000539719	ZNF362	NM_152493	4.97984e-06	-1.52423	1.61032e-07	-1.75851	-1.64137
16675924	NM_001114309 // ELF3 // E74-like factor 3 (ets domain transcription factor, epithelial-	ELF3	NM_001114309	6.54218e-09	-1.86402	5.67245e-06	-1.42818	-1.6461
16709201	NM_145341 // PDCD4 // programmed cell death 4 (neoplastic transformation inhibitor) //	PDCD4	NM_145341	0.000180956	-1.50389	3.32873e-06	-1.82143	-1.66266
17047985	NM_021722 // ADAM22 // ADAM metallopeptidase domain 22 // 7q21 // 53616 /// ENST0000039	ADAM22	NM_021722	9.00959e-05	-1.63971	1.72607e-05	-1.78868	-1.7142
16907912	NM_001079526 // IKZF2 // IKAROS family zinc finger 2 (Helios) // 2q34 // 22807 /// NM_0	IKZF2	NM_001079526	6.99029e-05	-1.64687	1.44559e-05	-1.78823	-1.71755
16855477	NM_001012515 // FECH // ferrochelatase // 18q21.3 // 2235 /// NM_000140 // FECH // ferr	FECH	NM_001012515	7.72619e-05	-1.581	2.7659e-06	-1.87018	-1.72559
16931225	NM_015653 // RIBC2 // RIB43A domain with coiled-coils 2 // 22q13.31 // 26150 /// ENST00	RIBC2	NM_015653	3.58084e-07	-1.94089	1.76294e-05	-1.60146	-1.77117
16741142	NM_000695 // ALDH3B2 // aldehyde dehydrogenase 3 family, member B2 // 11q13 // 222 ///	ALDH3B2	NM_000695	7.01833e-06	-1.78383	8.42014e-06	-1.76695	-1.77539
16760350	NM_001159576 // SCNN1A // sodium channel, non-voltage-gated 1 alpha subunit // 12p13 //	SCNN1A	NM_001159576	4.10303e-05	-1.68352	5.75561e-06	-1.87048	-1.777
17117665	AK055252 // LOC100129502 // uncharacterized LOC100129502 // 15q26.1 // 100129502	LOC100129502	AK055252	1.0239e-05	-1.77197	6.48045e-06	-1.81568	-1.79383
16879250	NM_138801 // GALM // galactose mutarotase (aldose 1-epimerase) // 2p22.1 // 130589 ///	GALM	NM_138801	1.51764e-08	-2.2244	2.78357e-07	-1.88314	-2.05377
16906419	ENST00000261024 // SLC40A1 // solute carrier family 40 (iron-regulated transporter), me	SLC40A1	ENST00000261024	4.9288e-07	-2.13236	1.3032e-06	-2.0085	-2.07043
16896561	NM_000104 // CYP1B1 // cytochrome P450, family 1, subfamily B, polypeptide 1 // 2p22.2	CYP1B1	NM_000104	1.07885e-05	-1.45277	5.53927e-11	-2.70022	-2.07649
16857021	NM_001267560 // TJP3 // tight junction protein 3 // 19p13.3 // 27134 /// ENST0000054171	TJP3	NM_001267560	7.90306e-10	-2.61345	2.23815e-06	-1.66142	-2.13743
16885135	NM_002193 // INHBB // inhibin, beta B // 2cen-q13 // 3625 /// ENST00000295228 // INHBB	INHBB	NM_002193	2.5601e-12	-2.86184	1.2812e-07	-1.58586	-2.22385
16802232	NR_027654 // SMAD6 // SMAD family member 6 // 15q21-q22 // 4091 /// NM_005585 // SMAD6	SMAD6	NR_027654	3.13675e-05	-2.04151	1.17669e-06	-2.61326	-2.32739
17023799	NM_145176 // SLC2A12 // solute carrier family 2 (facilitated glucose transporter), memb	SLC2A12	NM_145176	1.05633e-07	-2.14954	1.78453e-09	-2.86885	-2.5092
16837348	NM_002758 // MAP2K6 // mitogen-activated protein kinase kinase 6 // 17q24.3 // 5608 ///	MAP2K6	NM_002758	3.05197e-09	-5.34709	7.27738e-08	-3.69574	-4.52141
